# Supplementary material for: Stepwise GATA1 and SMC3 mutations alter megakaryocyte differentiation in a Down syndrome leukemia model
Source: PubMed Central journal article supplement (PMC9282925; doi:10.1172/jci156290), 2022-07-15

1 **Stepwise GATA1 and SMC3 mutations alter megakaryocyte differentiation in a Down**  
2 **syndrome leukemia model**

3  
4 Brahim Arkoun<sup>1,2,3</sup>, Elie Robert<sup>3</sup>, Fabien Boudia<sup>3</sup>, Stefania Mazzi<sup>1</sup>, Virginie Dufour<sup>4</sup>, Aurélie  
5 Siret<sup>3</sup>, Yasmine Mammasse<sup>4</sup>, Zakia Aid<sup>3</sup>, Matthieu Vieira<sup>1</sup>, Imanci Aygun<sup>1</sup>, Marine Aglave<sup>5</sup>,  
6 Marie Cambot<sup>4</sup>, Rachel Petermann<sup>4</sup>, Sylvie Souquere<sup>6</sup>, Philippe Rameau<sup>7</sup>, Cyril Catelain<sup>7</sup>,  
7 Romain Diot<sup>8</sup>, Gérard Tachdjian<sup>8</sup>, Olivier Hermine<sup>2,9</sup>, Nathalie Droin<sup>1,10</sup>, Najet Debili<sup>1</sup>, Isabelle  
8 Plo<sup>1,2</sup>, Sébastien Malinge<sup>3,11</sup>, Eric Soler<sup>2,12</sup>, Hana Raslova<sup>1</sup>, Thomas Mercher<sup>3, \*</sup>, William  
9 Vainchenker<sup>1,2, \*</sup>

10  
11  
12  
13  
14

**Supplemental Data**

15 **Supplemental Methods**

16

17 **Cytospin preparation and cytologic staining**

18 Sorted cell populations were centrifuged onto slides at 300g with Cytospin II (Thermo Fisher)  
19 for 5 minutes. Smears were stained with May-Grünwald-Giemsa.

20

21 **Flow cytometry and cell sorting**

22 The cells were resuspended in a serum-free medium containing 3% (v/v) Bovine Serum  
23 Albumin (Sigma). All antibodies were from BD Biosciences and are listed in Table S5. The  
24 cells were assayed on BD Fortessa and data were analyzed with FlowJo software. Cell sorting  
25 was performed on BD Influx or BD FACSAria Fusion.

26

27 **Progenitors clonogenic assay**

28 CD34 and CD43 double positive population was seeded at a concentration of 2000 cells/ml in  
29 MethoCult™ H4434 Classic (Stemcell Technologies, Grenoble, France) for 14 days to  
30 determine clonogenic potential of erythroid and myeloid progenitors. To quantify colony-  
31 forming-unit-megakaryocyte progenitors (CFU-MK), CD34<sup>+</sup> and CD43<sup>+</sup> cells were seeded at  
32 2000 cells/ml in serum-free fibrin clots for 10 days. All experiments were performed in  
33 triplicates. MK progenitors were stained with an anti-CD41a monoclonal antibody (Fisher  
34 scientific; see Table S5) as previously described (Klimchenko *et al.*, 2009). Images were  
35 obtained using AxioVision 4.6 software.

36

37 **Proliferation assay**

38 CD34<sup>+</sup> and CD43<sup>+</sup> cells were seeded for 5 days under megakaryocytic culture condition (hSCF  
39 and hTPO) at a concentration of 100 000/ml in a 96 well plate. CD41<sup>+</sup> and CD42<sup>+</sup>  
40 megakaryocytes were counted using BD Fortessa (BD Biosciences).

41

42 **Ploidy**

43 DNA staining was performed by adding Hoechst (Thermo Fisher) staining solution to culture  
44 at a concentration of 10 µg/ml for 1 hour at 37 °C, 5% CO<sub>2</sub>. Cells were then washed and  
45 resuspended in the same staining medium (PBS 1X with Hoechst 10 µg/ml) and suspended in  
46 staining medium. CD41a-APC and CD42a-PE antibodies (see Table S5) were used for BD  
47 Fortessa analyses.

48

## 49 **Electron microscopy**

50 Day 18 fresh megakaryocytes were fixed in 2% glutaraldehyde in 0.1 M phosphate buffer, pH  
51 7.3 for 1 hour. Cells were pelleted and dehydrated in increasing concentrations of ethanol and  
52 embedded in Epon 812 according to routine procedures. Polymerization was carried out for 48  
53 hours at 64°C. Ultrathin sections (90 nm) were obtained using an ultramicrotome (Leica) and  
54 stained with standard uranyl acetate and lead citrate and observed with FEI Tecnai 12 electron  
55 microscope. Digital images were taken with a SIS MegaviewIII CCD camera. The major  
56 criteria for classifying megakaryocytes into different stages are the quality and quantity of  
57 cytoplasm and the size, lobulation, and chromatin pattern of the nucleus. The immature  
58 megakaryocyte (megakaryoblast) is characterized by a large round, indented, or bilobed  
59 nucleus, prominent nucleoli and cytoplasm devoid of alpha granules with rudiments of the  
60 demarcation membrane system (DMS). The mature megakaryocyte is identified by its  
61 condensed nuclei containing eu- and heterochromatin, a cytoplasm with alpha-granules and a  
62 well-developed DMS. 10 to 15 megakaryocytes from each condition were analyzed.

63

## 64 **Immunofluorescence and confocal imaging**

65 The cells were adhered onto polylysine slides for 1 h at 37°. Then, the cells were fixed with 4%  
66 paraformaldehyde for 10 min and permeabilized with a buffer containing 0.2% triton in PBS  
67 1X for 10 min, and blocked for 30 min in a buffer containing 0.1% BSA in PBS 1X. Primary  
68 and secondary antibodies were diluted in PBS containing 0.1% BSA; incubation was performed  
69 for 1 h for each antibody. Primary antibodies: rabbit anti-vWF at 1:400 (Dako, A0082), mouse  
70 anti-CD41 at 1:100 (BD, clone HIP8), mouse anti-beta1-tubulin (abcam, ab204947), mouse  
71 anti-CD63 at 1:100 (Sigma, SAB4700215, clone MEM 259) rabbit anti-GFP (abcam,  
72 ab183734), secondary antibodies: goat anti-rabbit Alexa Fluor 546, goat anti-mouse Alexa  
73 Fluor 488 (Molecular Probes) both diluted at 1:500. Slides were mounted using Vectashield  
74 with DAPI (Molecular Probes). Images were acquired under a confocal Leica SP8 microscope,  
75 with a 63x/1.4 numeric aperture oil objective (Leica Microsystem). Image analysis and  
76 quantification of colocalization were performed with the LASX software.

77

## 78 **Proplatelet formation**

79 MK were sorted and seeded at a concentration of 30 000 cells/mL in 96 well plate in triplicate  
80 in presence of recombinant hSCF and hTPO for 3 days. Proplatelet formation was assessed by  
81 counting the number of MK producing proplatelet branches per well.

82

83 **Retroviral particles production and transduction**

84 For lentiviral transduction, we used either the pRRL-GFP (addgene) as a negative control, or  
85 the pLeGO-iG-GFP vector encoding the human *NFE2* open reading frame (kindly provided by  
86 Heike Pahl). Briefly, Lentiviral particles were produced in 293T cells which were co-  
87 transfected with plasmids of interest, along with a packaging plasmid (pCMV) and a VSV  
88 envelope expression plasmid (pMD2.G) using jetPRIME transfection reagent (Polyplus  
89 transfection, Ozyme). Supernatants were collected at 48h and concentrated by ultra-  
90 centrifugation.

91

92 **RNA extraction and qRT-PCR**

93 mRNA was isolated using a Direct-zol RNA MicroPrep Kit Kit (Zymo research) and quantified  
94 using a NanoDrop (Thermo Fisher Scientific). Reverse transcription was carried out with Vilo  
95 SuperScript Enzyme (Thermo Fisher Scientific). qPCR was performed with ONEGreen FAST  
96 qPCR Premix or Taqman Gene Expression Master Mix (Applied Biosystems) using a 7500HT  
97 Fast Real-Time PCR System (Applied Biosystems) according to the manufacturer's  
98 recommendations. The primer sequences are provided in Table S6.

99

100 **Western blot**

101 Total cells lysates were prepared as follows in 50mM Tris-HCl, pH 8, 150mM NaCl, 1% NP40,  
102 1mM EDTA, 0,1% SDS, and 0,5% DOC supplemented with protease inhibitors (PMSF 1X,  
103 NAF 1X, Sodium Orthovanadate 1X, complete 1X). Western blotting was performed using  
104 standard procedures using the following antibodies from: anti-GATA1, anti-SMC3, anti-H3,  
105 anti-PCNA (Table S5).

106

107 **GATA1/GATA1s quantification with flow cytometry**

108 CD41+/CD42+ MK were prepared using the Cell Signaling Buffer Set A Kit (Miltenyi, 130-  
109 100-827). Cells were resuspended with Insid Fix solution and incubated for 10 min at RT and  
110 permeabilized using Permeabilization Buffer A at 4°C for 30 min. Thereafter, the cells were  
111 incubated with anti-GATA1/GATA1s antibody and then with Alexa 546-conjugated antibody  
112 (Table S5) at RT for 30 min. All washing steps were performed with PBS containing 0.5%  
113 BSA.

114

115 **MYC inhibition with JQ-1**

116 Isolated CD34<sup>+</sup> CD43<sup>+</sup> cells were cultured in serum-free medium in presence of recombinant  
117 human thrombopoietin (TPO; Kirin Brewery, Tokyo, Japan) and stem cell factor (SCF;  
118 Biovitrum, Stockholm, Sweden). MYC inhibition was achieved using JQ-1 (Clinisciences) in a  
119 dose dependent manner varying from 10 to 100 nM on day 0 and then day 2. At day 5 of culture,  
120 the cells were stained with CD41a-APC and anti-CD42a-PE antibodies before they were  
121 analased using BD Fortessa.

122

### 123 **Violet dye**

124 Hematopoietic progenitors derived from iPS cells were first stained using CD34-PE-Cy7 and  
125 CD43-FITC antibodies (BD Pharmingen). Violet dye (BD Horizon) was then added following  
126 manufacturer's protocol. Cells positive for both markers were then sorted using BD Influx  
127 sorter. Sorted cells were cultured in serum free medium in presence of TPO, SCF in the absence  
128 or presence of JQ-1 inhibitor (Clinisciences). At day 2, cells were collected, stained using anti-  
129 CD41a-APC and anti-CD42a-PE antibodies (BD Pharmingen) and analyzed using BD Fortessa.

130

### 131 **RNAseq samples collection and library preparation**

#### 132 *Data generation*

133 For RNAseq, each condition was represented by a randomly selected clone and all the clones  
134 were isogenically compared. Cells were labeled with APC, BV421 and PE-conjugated  
135 antibodies against CD41a, CD42b and CD33 (see Table S5), respectively. In order to obtain a  
136 highly purified megakaryocytes, CD33<sup>+</sup> cells were removed from the double positive CD41,  
137 CD42 population during cell sorting. After sorting, the purity was verified and corresponded to  
138 98-100% of CD41<sup>+</sup>, CD42<sup>-</sup>, CD33<sup>-</sup>. Total RNA was extracted using RNA/DNA/Protein  
139 Purification Plus Kit (Proteogene, St Marcel, France). Whole transcriptome sequencing was  
140 performed at the GenomEast Platform (Illkirch, France). cDNA libraries were synthesized from  
141 250 ng total RNA using TruSeq Strandandard mRNA Kit (Illumina). Libraries were verified for  
142 their amount and quality by capillary electrophoresis using a 2100 Bioanalyzer (Agilent  
143 Technologies). Sequencing was performed at 2×100 bp using the Illumina HiSeq 4000  
144 technology, yielding > 40 million reads per sample.

#### 145 *Data analysis*

146 Adapters dimer reads were removed using DimerRemover. Salmon (version 0.14.2) was used  
147 for the transcription quantification of the RNA-seq data with an algorithm of selective  
148 alignment. To this end, we retrieved the decoy transcriptome (a fasta files associated with a  
149 decoy.txt file) generated from the human transcriptome (Grch37/hg19) available at the  
150 following link :

151 <https://drive.google.com/drive/folders/14VqSdZAKH82QwDWhMXNLFqMoskoqv3fS>

152 Then, a Salmon index required for the transcription quantification using the command salmon  
153 index was generated with the following parameters: -k 31, --decoys.txt, -t gentrome.fa. Finally,  
154 the quantification of reads was performed with the salmon quant command using the following  
155 parameters: --seqBias, -gcBias, -l A --validateMappings.

156 All subsequent analyses were performed with R (v4.0.3). All subsequent analyses were  
157 performed using R (4.0.3). Firstly, an R TxDB object was generated using the function  
158 makeTxDbFromGFF of the R package GenomicFeatures (1.42.3). The address used as value  
159 of the argument file of this function was: [ftp://ftp.ensembl.org/pub/release-97/gtf/homo\\_sapiens/](ftp://ftp.ensembl.org/pub/release-97/gtf/homo_sapiens/). The function tximport of the R package tximport (1.18.0) was used to  
160 import transcript-level estimates and summarizes abundances, counts, and transcript lengths to  
161 the gene-level (with arguments type = "salmon", txOut =  
162 FALSE, tx2gene=tx2gene, ignoreTxVersion=TRUE, with tx2gene corresponding to the TxDB  
163 object previously generated). An R object of class DESeqDataSet was generated using the  
164 function DESeqDataSetFromTximport of the R package DESeq2 (1.30.1). Only genes  
165 associated with at least 10 counts were kept (rowSums(counts(dds)) >= 10) for further analysis.  
166 Size factors were computed using the function estimateSizeFactors of DESeq2. The vst  
167 (variance stabilizing transformation) transformation (implemented in the DESeq2 package) was  
168 then applied to the count matrix using the vst function (with argument blind equal to FALSE).  
169 A PCA of the vst transformed count matrix was performed using the function PCA (with  
170 argument scaling equal to FALSE) of the package FactoMineR (2.4). This matrix was also used  
171 for violin plot representations of gene expression as well as input matrix to perform GSEA.  
172 Differential expression analysis between experimental conditions was performed with the  
173 function DESeq (with default parameters). The function lfcShrink (the value of the parameter  
174 type was apeglm) was employed to get estimation of LFC2 (Log2 Fold Change) and of the  
175 associated posterior standard deviation (called lfcSE) for each gene between conditions. GSEA  
176 was performed using the software GSEA (v4.1.0). Heatmap representations were performed  
177 with the package ComplexHeatmap (v2.6.2).

178  
179

## 180 **3' Single-cell RNAseq**

### 181 *Data generation*

182 iPSC-derived CD43-positive cells were sorted at day 13 of culture and prepared at room  
183 temperature. Single-cell suspensions were loaded onto a Chromium Single Cell Chip (10x  
184 Genomics) according to the manufacturer's instructions for co-encapsulation with barcoded Gel  
185 Beads at a target capture rate of ~10,000 individual cells per sample. Captured mRNAs were  
186 barcoded during cDNA synthesis using the Chromium Next GEM Single Cell 3' GEM, Library  
187 & Gel Bead Kit v3.1 (10X Genomics) according to the manufacturer's instructions. All samples  
188 were processed simultaneously with the Chromium Controller (10X Genomics) and the  
189 resulting libraries were prepared in parallel in a single batch. We pooled all of the libraries for  
190 sequencing in a single SP Illumina flow cell. All of the libraries were sequenced with an 8-base  
191 index read, a 28-base Read1 containing cell-identifying barcodes and unique molecular  
192 identifiers (UMIs), and a 91-base Read2 containing transcript sequences on an Illumina  
193 NovaSeq 6000.

### 194 *Data analysis*

#### 195 1) Counts matrix generation

196 Adapters sequences were removed using cutadapt (v2.10) with options `-nextseq-trim 28` and `-`  
197 `a AGATCGGAAGAGCGTCGTGTAGGGAAAGAGTGT`

198 Counts quantification were performed using kallisto (v0.46.2) and bustools (v0.40.0). The  
199 index used for alignments was performed thanks to kb-python (v0.40.0) by employing the  
200 command `kb ref` with the `fasta` and `GTF` files, respectively available at :  
201 `ftp://ftp.ensembl.org/pub/release-99/fasta/homo_sapiens/dna/Homo_sapiens.GRCh38.dna.`  
202 `primary_assembly.fa.gz` and `ftp://ftp.ensembl.org/pub/release-99/gtf/homo_sapiens/`  
203 `Homo_sapiens.GRCh38.99.gtf.gz`.

204 Bus files were generated using kallisto bus (with option `-x 10xv3`). They were then sorted using  
205 bustools with the command `bustools sort` (with default behavior that is sort by barcode, UMI,  
206 `ec` then `flag`). To correct wrong UMIs, the command `bustools correct` has been used. The file of  
207 whitelisted barcodes to correct wrong UMIs was retrieved by downloading cellranger (version  
208 3.1.0 of 10XGenomics). The file `3M-february-2018.txt.gz` available with this software was used  
209 as the file of whitelisted barcodes. The count matrix was then generated using the command  
210 `bustools count` (with option `-genecounts` in order to aggregate counts to gene only).

#### 211 2) Importation, filtration of the matrix and normalization

212 All subsequent analyses were performed using R (v4.0.3). The function `read_count_output` of  
213 the Bioconductor package `BUSpaRse` (v1.4.2) was used to generate a sparse matrix

214 (dgCMatrix) usable for further analyses with R. Droplets associated with counts sum lower than  
215 1000 were removed. Droplets exhibiting less than 200 detected genes were also removed as  
216 well as droplets exhibiting more than 20 % of UMIs corresponding to mitochondrial genes. The  
217 cell cycle stage associated to each droplet was then predicted with the function  
218 CellCycleScoring of the package Seurat (4.0.1) using the lists of genes provided by the function  
219 cc.genes.updated.2019 of Seurat. Only genes detected in more than 5 % of cells were kept for  
220 further analyses. Doublets detection (identification of droplets containing two cells instead of  
221 one) were performed either with the function scDblFinder of the package scDblFinder (v1.4.0)  
222 or with the function cxds\_bcdrs\_hybrid of the package scdrs (v1.6.0). Droplets that were tagged  
223 as doublets by at least one of these two alternative methods were removed and not used for  
224 further analyses. Normalization was performed using the function SCTransform of Seurat (with  
225 arguments variable.features.n = 3000, vars.to.regress = NULL and return.only.var.genes =  
226 TRUE).

### 227 3) Integration of all the single cell datasets (all experimental conditions)

228 To precisely characterize the differentiation defects according to the different genotypes, an  
229 integration of all datasets (one dataset per condition) was performed. To this end, genes used  
230 for the integration were selected with the function SelectIntegrationFeatures (Seurat) using all  
231 normalized datasets (each one associated to a distinct Seurat object). Seurat objects associated  
232 to each dataset were preprocessed using PrepSCTIntegration (Seurat function) before the  
233 integration of all datasets. To perform the integration strictly speaking, two functions were used:  
234 firstly the Seurat function FindIntegrationAnchor (with argument normalization.method =  
235 "SCT") and then the function IntegrateData (with argument normalization.method="SCT").  
236 The function RunPCA (with argument npcs = 20) was used in order to perform a PCA  
237 dimensionality reduction of the integration of all datasets. Then the UMAP technique was  
238 employed to obtain a projection of the integration (RunUMAP function with arguments  
239 reduction = "pca" and dims = 1:20). Classification of cells was performed using the k-nearest  
240 neighbors' algorithm with the Seurat function FindNeighbors (with arguments reduction =  
241 "pca", dims = 1:20). Then cells were clustered using the SNN algorithm with the Seurat function  
242 FindClusters (with argument resolution=1.1).

### 243 4) Cell type determination

244 In order to determine to which kind of cells is associated each cluster of the integration, lists of  
245 genes specific to several lineages were used. To determine whether the number of genes  
246 detected in these specific lists of genes was higher or lower to what it is expected by chance, a  
247 specific method was created. For each dataset used for the integration, 100 randomly selected



248 lists of genes of the same size as the list of interest were generated (the only criteria to include  
249 these genes was that they should be detected in more than 2% of cells of the dataset). For each  
250 of these lists, the percentage of detected genes (genes detected at least one time) was computed  
251 for each cell. In this way, it led to obtain distributions of the detection rate for random list of  
252 genes of the same size as the list of interest. Of note, the mean detection rate of these 100  
253 random lists is expected to be higher for cells exhibiting high sum of counts as compare to cells  
254 exhibiting low sum of counts. Therefore, it allows to consider that the detection rate of a specific  
255 list of genes does not just depend on the biology of the cell but also of the number of UMIs  
256 associated to the cell. For each cell, comparing the detection rate of the list of genes of interest  
257 to the distribution of the detection rate of 100 random lists of genes allow to compute a score  
258 that determine whether the detection rate observed for a list of genes of interest is significantly  
259 higher or lower to what is expected by chance, for a given cell. Applying this method for each  
260 cell allows to classify cells (significantly enriched, significantly depleted or neither enriched  
261 nor depleted). These classifications were used to identify specific populations of cells in the  
262 integrated dataset (for example to identify megakaryocytic cells or erythroid cells).

263

## 264 **ATACseq**

### 265 *Data generation*

266 The CD41+/CD42+ MK were sorted (10 000 to 30 000 cells) and submitted to cell lysis,  
267 transposition, and purification steps. The transposed DNA fragments were amplified by PCR  
268 12 times using adapters from the Nextera Index Kit (Illumina). PCR purification was performed  
269 using MinElute PCR Purification Kit (Qiagen, 28004) to remove large fragments and remaining  
270 primers. Library quality was assessed using an Agilent 2100 Bioanalyzer (Agilent Technologies  
271 5067-4626). Libraries were sequenced using NovaSeq-6000 sequencer (Illumina; 50 bp paired-  
272 end reads).

### 273 *Data analysis*

274 ATACseq analysis were performed using the ATACseq nfcore pipeline (nf-core/atacseq:  
275 v1.2.1) available at <https://nf-co.re/atacseq>. Versions of the softwares used by this pipeline are  
276 given below: Nextflow (v20.04.1), FastqQC (v0.11.9), Trim Galore ! (v0.6.4\_dev), BWA  
277 (v0.7.17-r1188), Samtools (v1.10), BEDTools (v2.29.2), BamTools (v2.5.1), deepTools  
278 (v3.4.3), Picard (v2.23.1), R (v3.6.2), Pysam (v0.15.3), MACS2(v2.2.7.1), ataqv (v1.1.1),  
279 featureCounts (v2.0.1), Preseq (v2.0.3), Multiqc (v1.9).

280 Files that has been used by the pipeline are given below :

281 fasta file: s3://ngi-igenomes/igenomes//Homo\_sapiens/UCSC/hg38/Sequence/

282 WholeGenomeFasta/genome.fa  
283 GTF file: s3://ngi-igenomes/igenomes//Homo\_sapiens/UCSC/hg38/Annotation/  
284 Genes/genes.gtf  
285 Gene bed file:s3://ngi-igenomes/igenomes//Homo\_sapiens/UCSC/hg38/Annotation/  
286 Genes/genes.bed  
287 BWA Index: s3://ngi-igenomes/igenomes//Homo\_sapiens/UCSC/hg38/Sequence/  
288 BWAIndex/genome.fa  
289 Blacklist BED :/home/e\_robert@intra.igr.fr/.nextflow/assets/nf-core/atacseq/assets/blacklists/  
290 hg38-blacklist.bed  
291 The pipeline was launched using the following command line:  
292 nextflow run nf-core/atacseq --input \$pathdesign --genome hg38 --outdir \$pathresults -resume  
293 -c \$pathconfigfile. With this command line, MACS2 (used for the peak calling) performs the  
294 peak calling with the mode broad peak.  
295  
296 Results obtained with the ATACseq nfcore pipeline (more specifically MACS2 results) were  
297 then used to select differential peaks (associated to an FDR < 0.01) either higher or lower in a  
298 condition as compare to another condition (according to the sign of the log2 fold change). For  
299 comparisons of interest, peaks were annotated with the command annotatePeaks.pl (Homer  
300 v4.11) and motifs analysis was performed employing the command findMotifsGenome.pl  
301 (Homer) associated to the option -size 200. The files knownResults.html were used to identify  
302 motifs of interest.  
303  
304 Profile plot for scores over sets of genomic regions (list of genes of interest) were performed  
305 using the tool plotProfile (deepTools) with the bigwig files generated by the ATACseq nfcore  
306 pipeline. Chromosomal locations of list of genes of interest were retrieved using the  
307 Bioconductor packages GenomicFeatures (v1.42.3) and  
308 TxDb.Hsapiens.UCSC.hg38.knownGene (v3.10.0).  
309  
310 **CUT & Tag**  
311 *Data generation*  
312 500 000 CD41<sup>+</sup>/CD42<sup>-</sup> MK sorted cells were used to analyze GATA1 and GATA1s chromatin  
313 occupancy using the CUT&Tag-IT Assay Kit (Active Motif) according to the manufacturer  
314 recommendations. Briefly, cells were bound to Concanavalin A-Coated Beads and incubated  
315 with primary anti-GATA1 antibody in buffer with Protease Inhibitor Cocktail and 5%

316 digitonine overnight at 4°C under rotation. The Guinea Pig anti-rabbit secondary antibody was  
317 incubated in Dig-Wash buffer for 1 hour at RT under rotation. After 3 washes, the CUT&Tag-  
318 IT™ Assembled pA-Tn5 Transposomes (1:100) were added for 1 hour at RT under rotation  
319 and tagmentation was performed during 1 hour at 37°C. DNA was purified and libraries were  
320 generated by PCR. The final libraries were purified, pooled together in equal concentrations  
321 and subjected to paired-end sequencing (100 cycles: 2x50) in Novaseq-6000 sequencer  
322 (Illumina) at Gustave Roussy.

### 323 *Data analysis*

324 Fastq files were trimmed using Trim Galore! (v0.6.7). Alignments (hg38 genome) were  
325 performed using bowtie2 (2.4.4) with arguments `--end-to-end --very-sensitive --no-mixed --no-`  
326 `discordant --phred33 -I 10 -X 700`. Sam files were sorted using picard SortSam (Picard v2.25.7).  
327 PCR duplicates were removed using picard MarkDuplicates. Sam files were converted into bam  
328 files with the command `samtools view -S -b 2` (samtools v1.13). To filter unmapped reads and  
329 PCR or optical duplicate and keep the mapped read pairs, the command `samtools view -b -F`  
330 `0x04 -F 0x100` was used. Blacklist regions ([https://github.com/Boyle-](https://github.com/Boyle-Lab/Blacklist/tree/master/lists/hg38-blacklist.v2.bed)  
331 `Lab/Blacklist/tree/master/lists/hg38-blacklist.v2.bed`) were removed using the command  
332 `bedtools intersect (bedtools v 2.30.0)`. Callpeak was performed with MACS2 (v2.2.7.1) using  
333 the command `macs2 callpeak -t file.bam --qvalue 0.0001 --nomodel --extsize 200 --keep-dup`  
334 `all -f BAMPE`.

335

336 Supplemental Figures

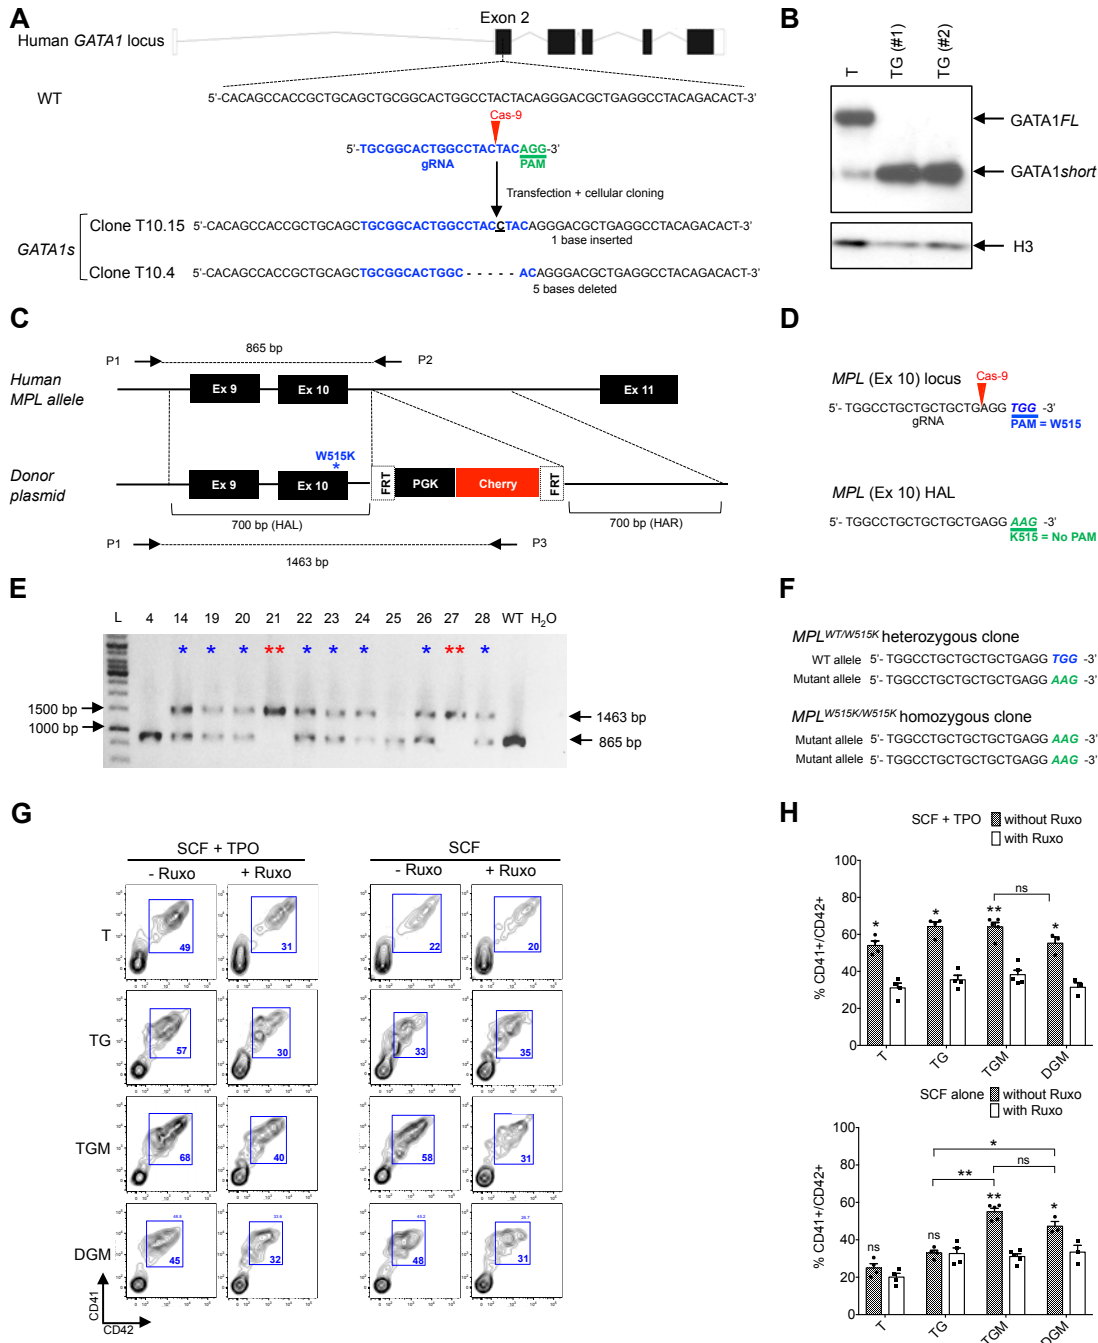

**Figure S1. Generation of *GATA1s*, *MPL*<sup>W515K</sup> and *SMC3*<sup>+/-</sup> mutations in iPSCs.**

(A) Targeting strategy of the exon 2 *GATA1* gene with the designated guide RNA (gRNA) and the resulting Indel sequences. (B) Immunoblots for GATA1 protein isoforms in T and T *GATA1s* iPSC clone-derived MK (iMK). Histone 3 (H3) was used as an endogenous control. (C) The Knock-In strategy used for the generation of *MPL*<sup>W515K/W515K</sup> mutation in one of the T21 *GATA1s* iPSC clones. The primers P1, P2 and P3 were used for the genotyping of Cherry-positive selected clones: Wild type allele amplified with P1 and P2 (865 bp); Mutant allele amplified with P1 and P3 (1463 bp). (D) The Knock-In associated-guide RNA (gRNA) targeting exon 10 of *MPL* gene. The PAM corresponded to the W515 (TGG), which was replaced by K515 (AAG) present in HAL of the donor plasmid. (E) Identification of the Cherry-positive clones after PCR electrophoresis. The blue stars show heterozygous *MPL*<sup>WT/W515K</sup> clones (bands: 865 bp + 1463 bp) while the red stars show homozygous *MPL*<sup>W515K/W515K</sup> clones (band: 1463 bp). A wild type clone control was integrated and shows only the band at 865 bp. (F) Example of the *MPL*<sup>WT/W515K</sup> or *MPL*<sup>W515K/W515K</sup> mutant clones obtained after Sanger sequencing. (G) Representative flow cytometry analysis of MK cultures obtained in the presence of SCF alone or SCF+TPO +/- Ruxolitinib (Ruxo). (H) Histograms of the percentage of CD41<sup>+</sup>CD42<sup>+</sup> obtained in the indicated conditions. Results are represented as mean ± SEM with n=5.

## Figure S1 (continued)

I

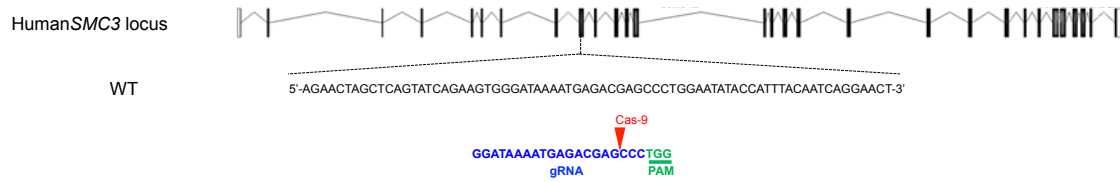

J

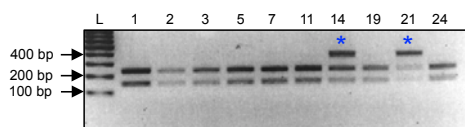

K

TS mutant allele 5'-GAAGTGGGATAAAATGAGACGAGCCCTGGGAATATACCA-3'  
Insertion 1 base

TGS mutant allele 5'-GAAGTGGGATAAAATGAGAC-----CA-3'  
Deletion 16 bases

TGMS mutant allele 5'-GAAGTGGGATAAAATGAGA-----ATATACCA-3'  
Deletion 11 bases

DGMS mutant allele 5'-GAAGTGG-----AATATACCA-3'  
Deletion 22 bases

L

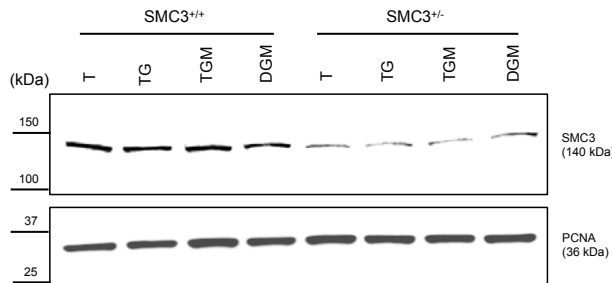

M

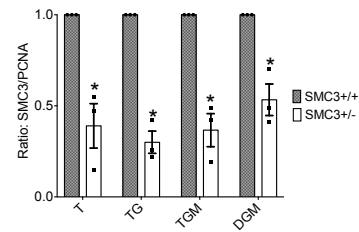

N

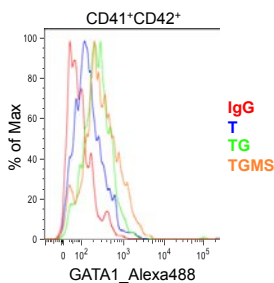

O

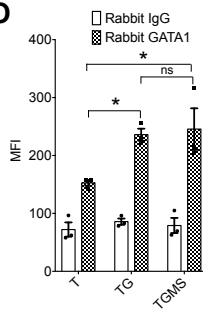

P

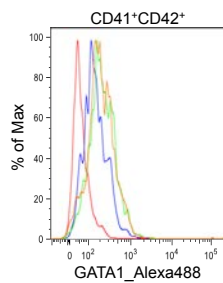

Q

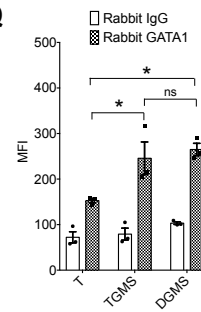

(I) Targeting strategy of exon 9 *SMC3* gene with the designated gRNA. (J) Genotype analyses of GFP-positive transfected iPSC clones using BanII restriction enzyme. The stars show heterozygous *SMC3* mutant clones (#S14, #S21) containing either the non-digested (BanII restriction site modified by Cas-9 endonuclease; presence of indel) or digested allele (BanII restriction site remained WT) at 381 bp or 236 bp and 145 bp, respectively. (K) Example of the resulting Indel sequences per genotype containing *SMC3*<sup>+/-</sup> mutation. (L) Immunoblot for *SMC3* in *SMC3*<sup>+/+</sup> and *SMC3*<sup>+/-</sup> iPSC clones. PCNA was used as an endogenous control. (M) Semi-quantitative evaluation of results shown in E. For each genotype, the *SMC3* band intensity was normalized using PCNA band intensity and is represented relative to the *SMC3*<sup>+/+</sup> condition. The data are represented as the mean ± SEM (*n* = 3). (N) Intracellular flow cytometry analyses of GATA1<sup>WT</sup>/GATA1s protein expression in T, TG and TGMS CD41<sup>+</sup>CD42<sup>+</sup> MK population. (O) Histogram shows the mean fluorescence intensity of GATA1<sup>WT</sup>/GATA1s in the indicated conditions. The data are represented as the mean ± SEM (*n* = 3). (P) Flow cytometry analyses of GATA1<sup>WT</sup>/GATA1s protein expression in T, TGMS and DGMS CD41<sup>+</sup>CD42<sup>+</sup> MK population. (Q) Histogram shows the mean fluorescence intensity of GATA1<sup>WT</sup>/GATA1s in the indicated conditions. The data are represented as the mean ± SEM (*n* = 3).

## Figure S1 (continued)

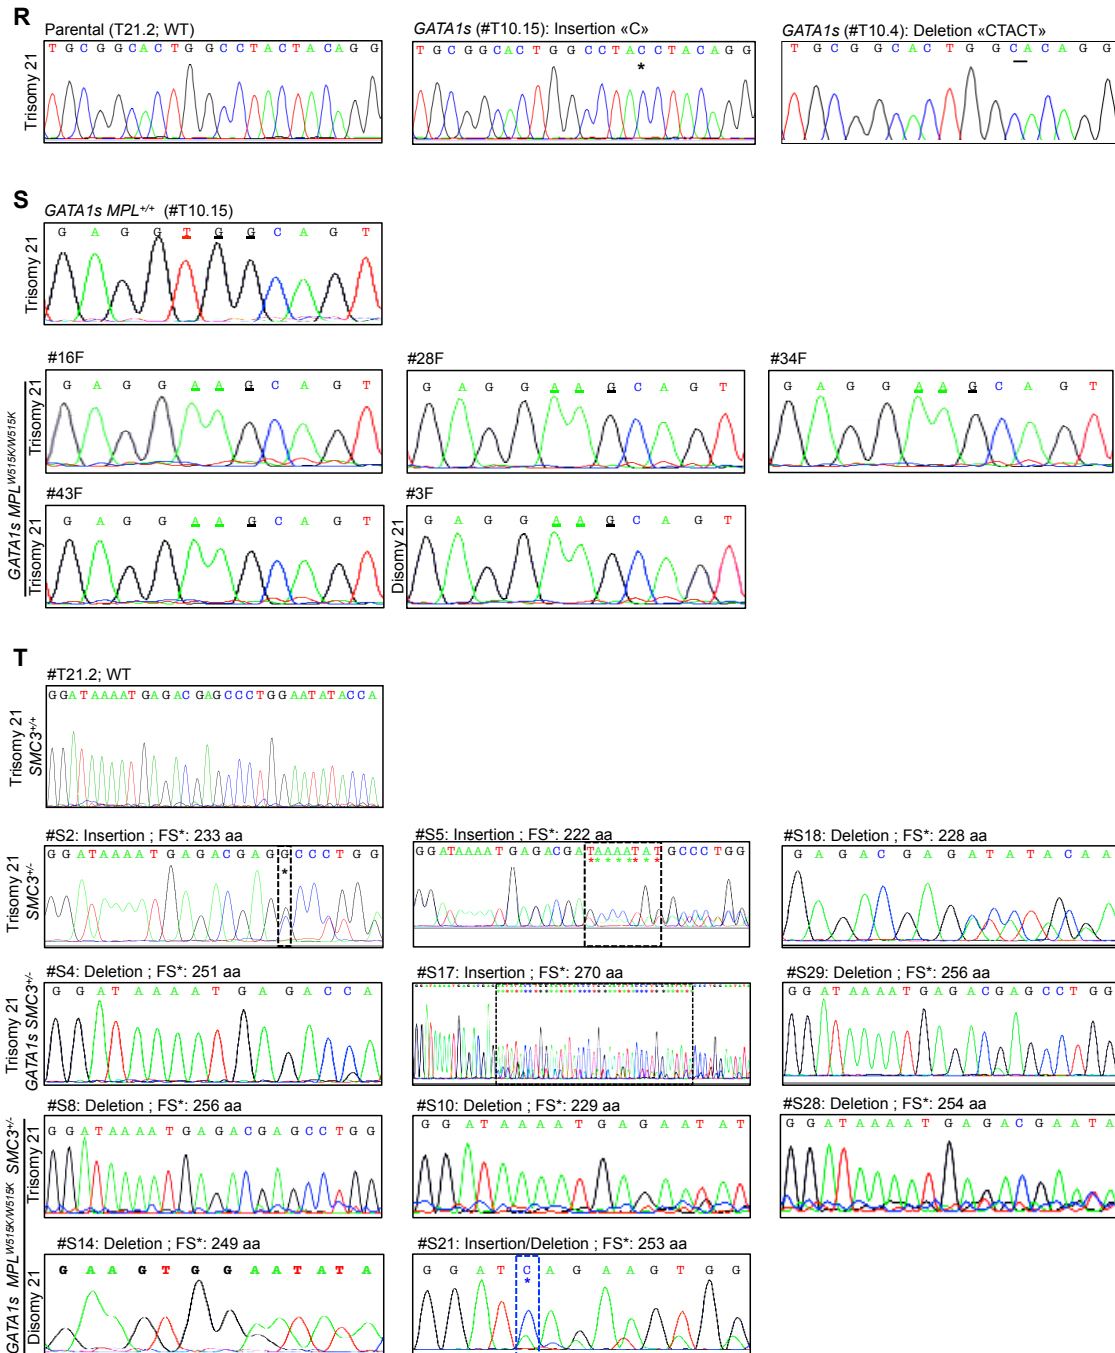

**(R)** Sanger sequencing results showing the indels obtained for TG clones. The sequence of T (parental) iPSC clone is also shown as a control. **(S)** Sanger sequencing results showing the *MPL<sup>W515K/W515K</sup>* mutant clones in the T or D contexts. The substitution of “TGG” (W515) by “AAG” (K515) in exon 10 of the *MPL* gene is shown for each clone. The corresponding wild type sequence (*MPL<sup>WT/WT</sup>*) of TG iPSC clone is also shown as a control. **(T)** Sanger sequencing results showing the *SMC3<sup>+/-</sup>* indels obtained for T, TG, TGM and DGM clones. The corresponding wild type sequence (*SMC3<sup>+/+</sup>*) of T iPSC clone is also shown as a control.

340  
341

**Figure S1 (continued)**

**U**

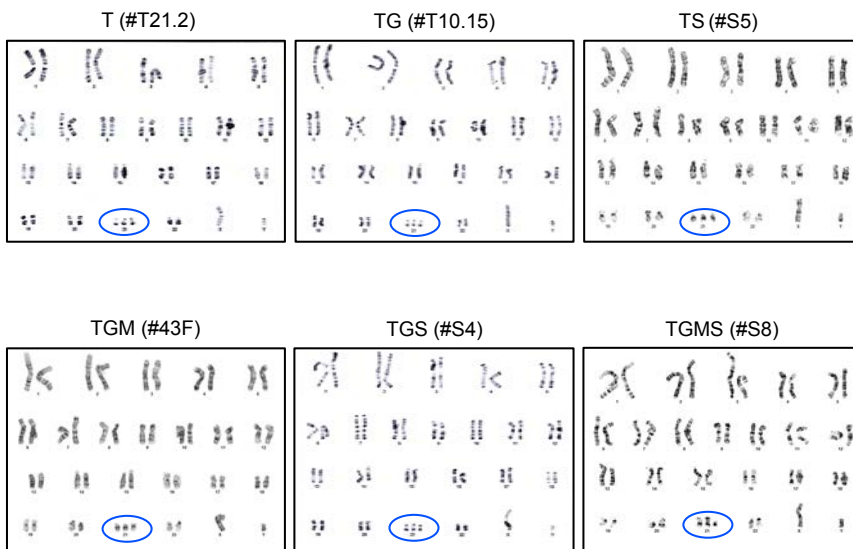

**V**

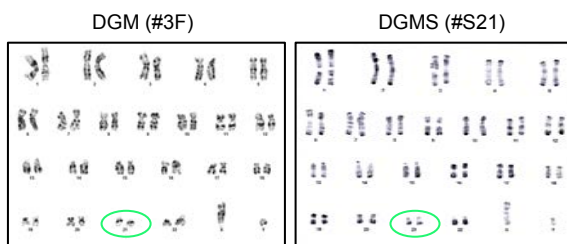

**W**

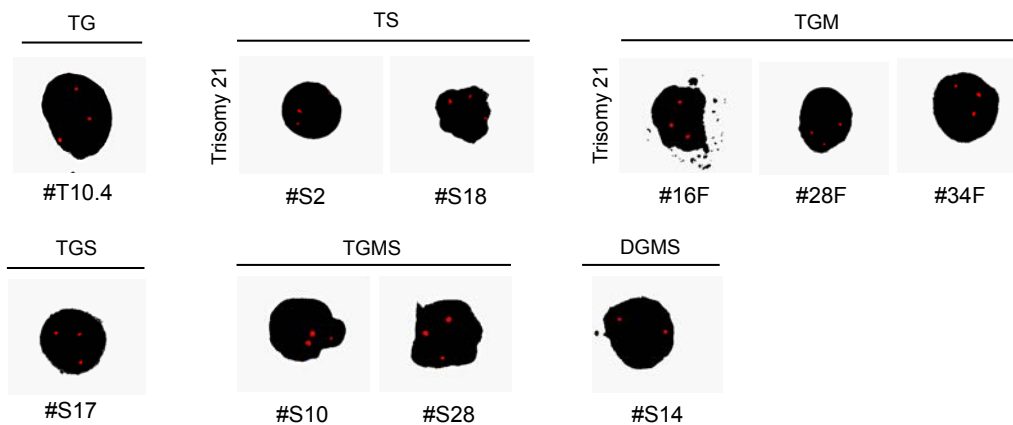

(U) Karyotypic analyses of T (parental), TS, TG, TGM and TGMS iPSC clones. (V) Karyotypic analyses of DGM and the subsequent DGMS iPSC clones. (W) Fluorescent *In Situ* Hybridization (FISH) analyses for the presence or absence of the trisomy 21. Statistical significance was determined using one-tailed Mann-Whitney's U test:  $p < 0.05$  (\*),  $p < 0.01$  (\*\*),  $p < 0.001$  (\*\*\*)

342  
343

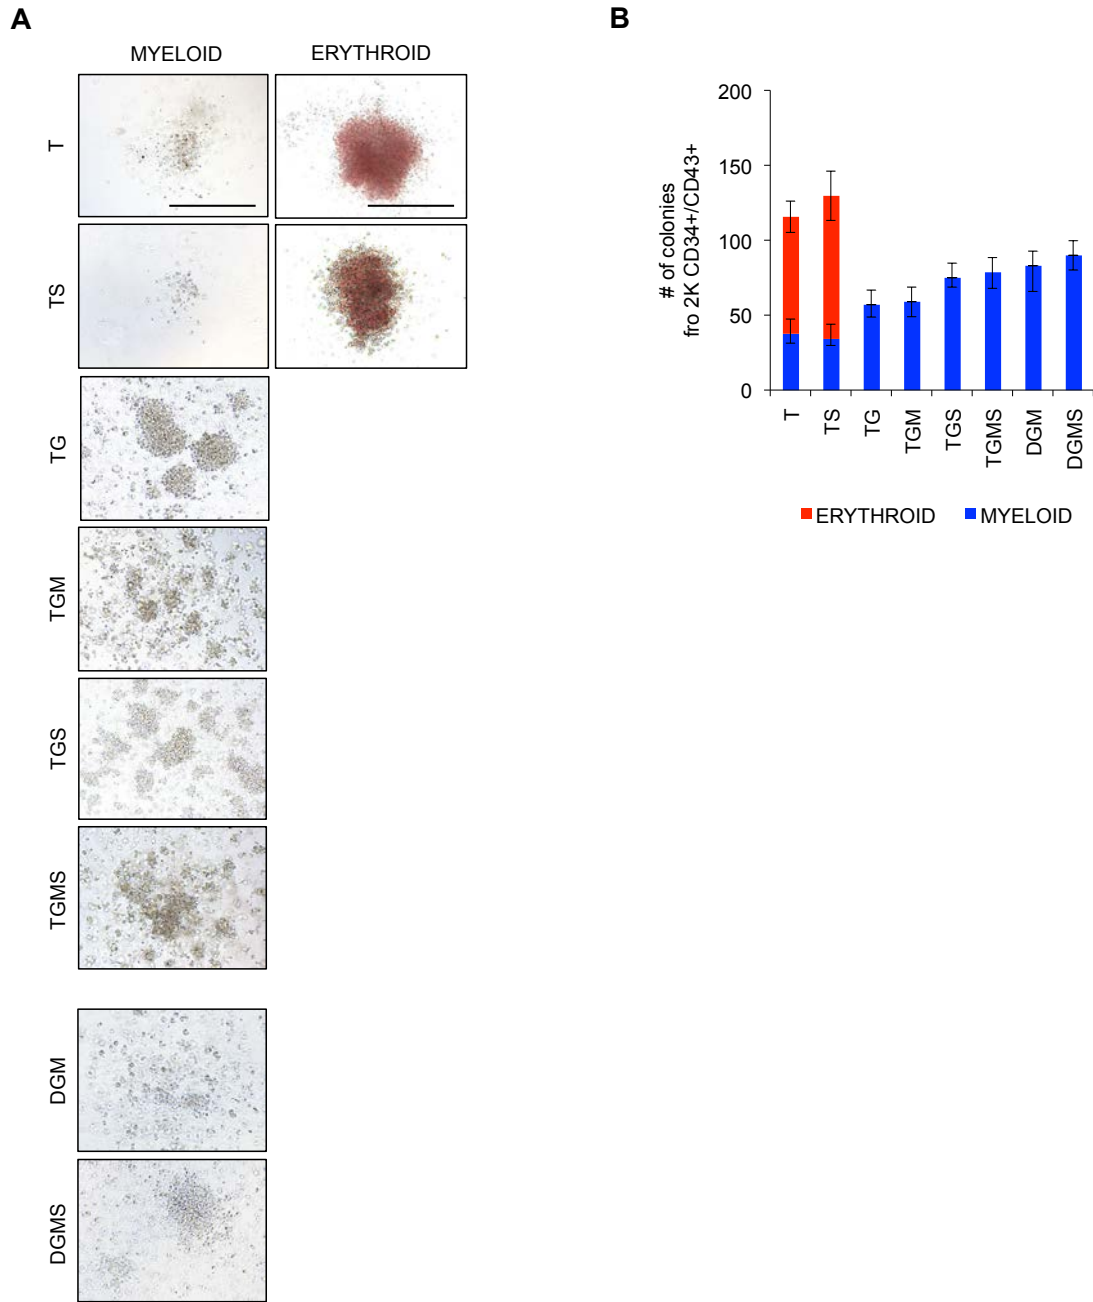

**Figure S2. Clonogenic potential of iPSC-derived hematopoietic progenitors according to the different genotypes.**

(A) Representative microphotographs of CFU-Myeloid (left panel) and Erythroid (right panel) colonies among the different genotypes. Scale bars represent 500  $\mu$ m. (B) Histogram showing the number of Erythroid and Myeloid colonies from 2000 CD34<sup>+</sup>CD43<sup>+</sup>, in methylcellulose culture assays.

344  
345



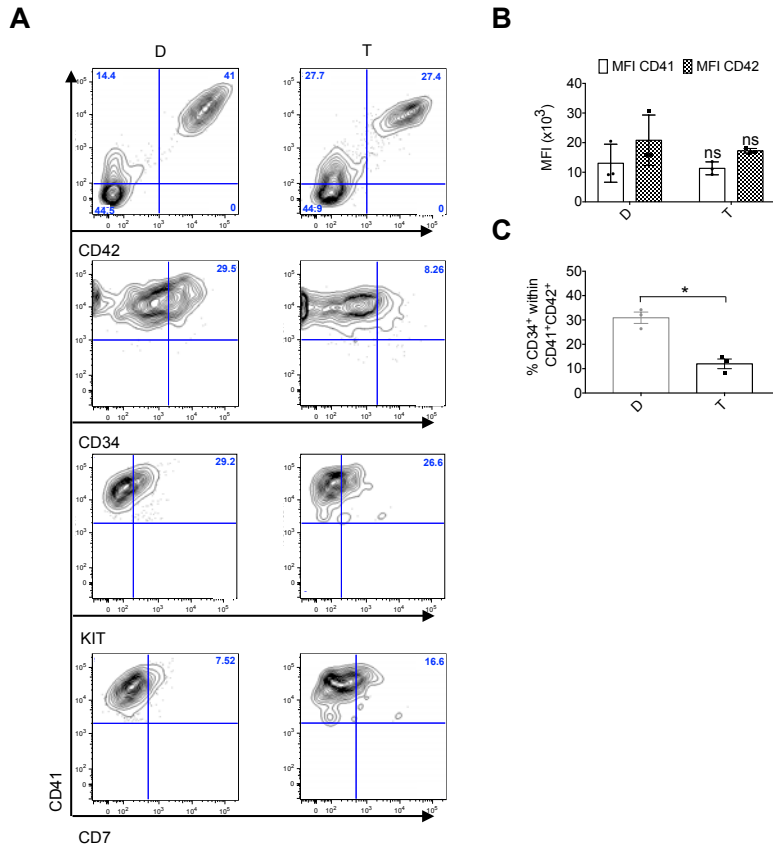

**Figure S3. Assessment of iMK differentiation**

(A-C) Immunophenotypes of iMK for the CD34, KIT, CD7, CD41 and CD42 markers found in DS-AMKL blasts. (A) Contour plots showing the expression of CD34, CD41, CD42, KIT and CD7 markers. (B) Histogram shows the MFI of CD41 and CD42. (C) Histogram shows the percentage of CD34<sup>+</sup>CD41<sup>+</sup> per total CD41<sup>+</sup> population. The results in B and C are represented as the mean  $\pm$  SEM,  $n = 3$ . Statistical significance was determined using one-tailed Mann-Whitney's U test:  $p < 0.05$  (\*),  $p < 0.01$ .

346  
347

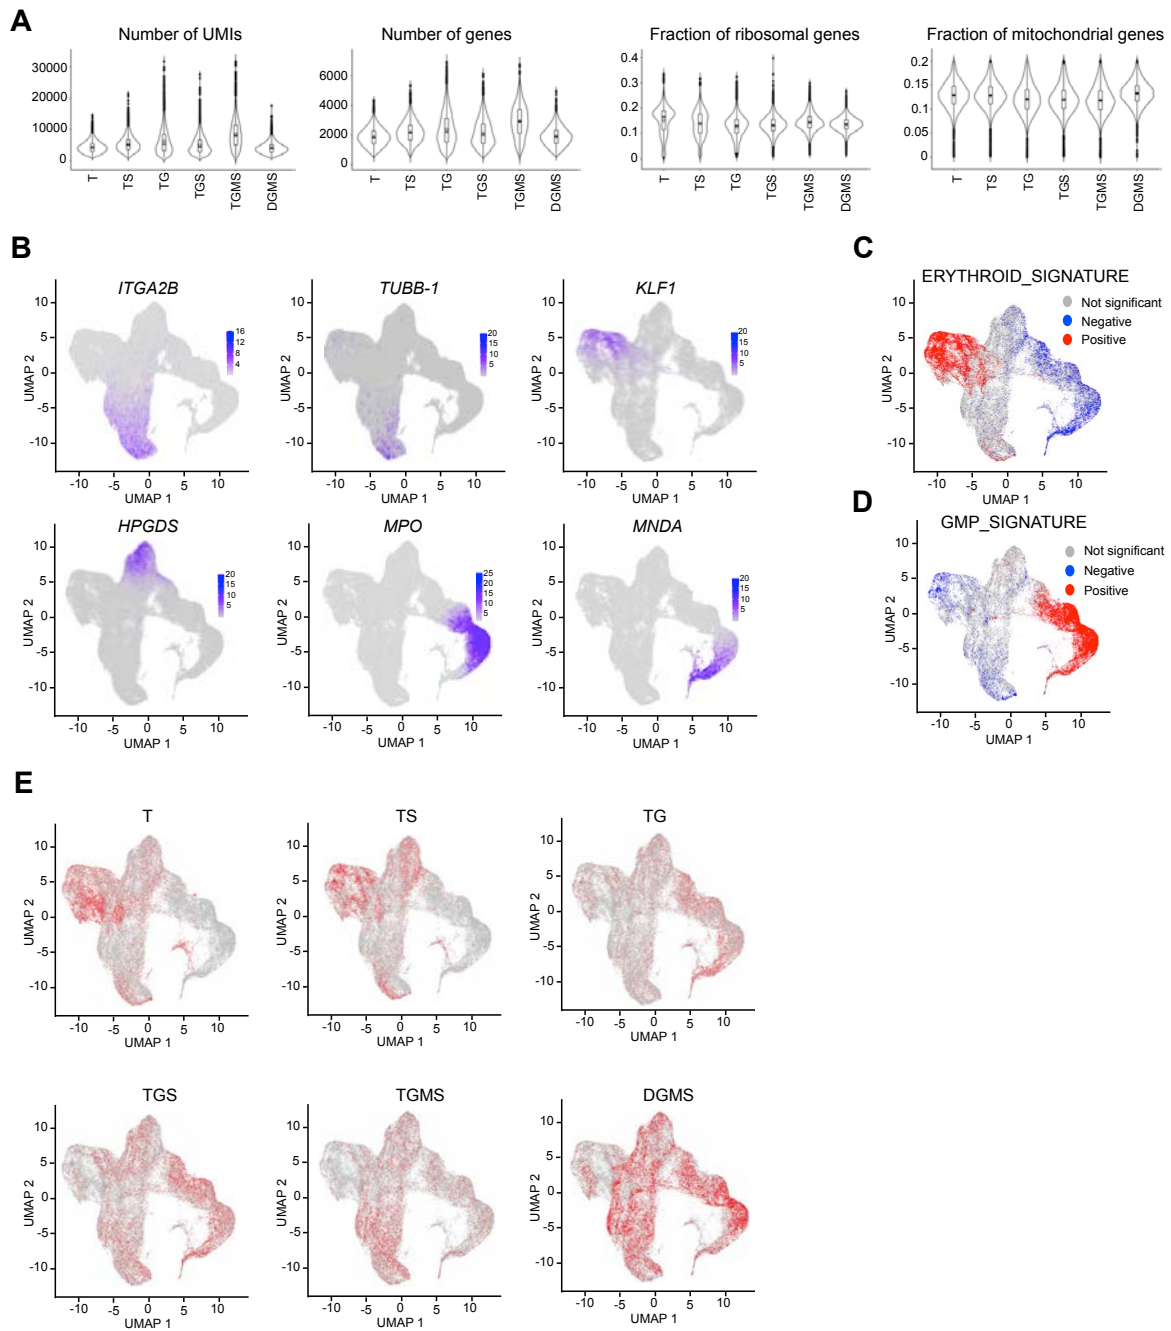

**Figure S4. scRNAseq of the iPSC-derived CD43<sup>+</sup> hematopoietic cells on day 13 of culture.**

(A) Violin plots showing either the number of UMIs or genes and the fractions of ribosomal or mitochondrial genes in the indicated conditions. (B) UMAP of the integration: points are colored according to the expression level of the indicated genes. (C-D) UMAP of the integration: the points colored in red are significantly enriched either for erythroid (C) or GMP (D) signatures. Points in blue are significantly depleted for the respective lineage signatures. Points in grey are not significant. (E) UMAP of the integration showing the localization (in red) of the cells from each data set in the integration.

348  
349

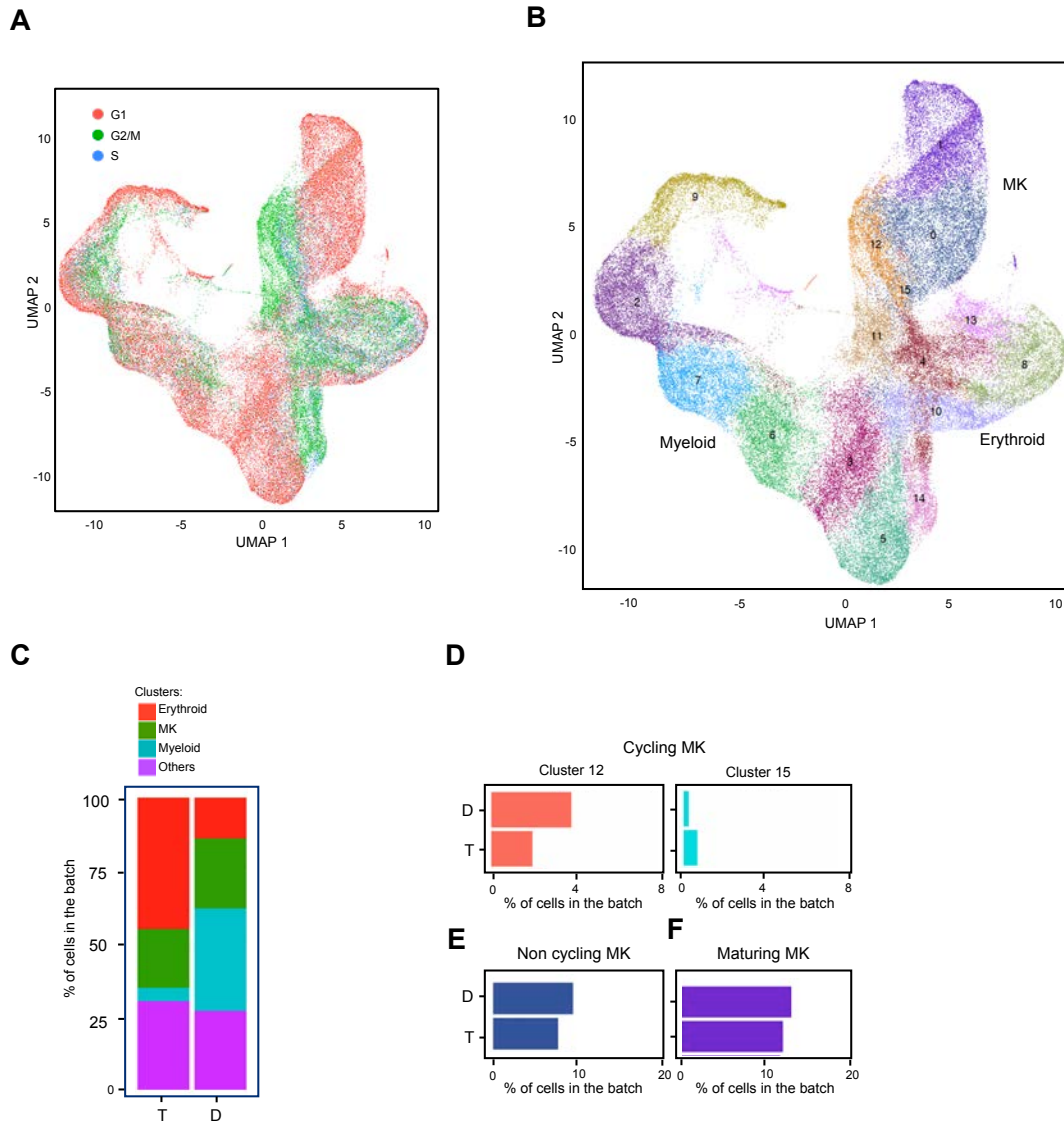

**Figure S5. scRNAseq of CD43<sup>+</sup> iPSC-derived hematopoietic cells at day 13 of culture.**

(A) UMAP integration with cells colored according to the predicted cell cycle stage (Seurat method). (B) UMAP integration of cells from D and T. Clusters were defined using the Louvain algorithm, numbered and labelled with unique colors. (C) Bar plot shows the proportion of cells in the indicated hematopoietic lineages for D and T. (D) Bar plots of the proportion of cells in the two clusters of cycling MK. (E) Bar plots of the proportion of cells in the cluster of non-cycling MK. (F) Bar plots of the proportion of cells in the cluster of maturing MK.

350  
351

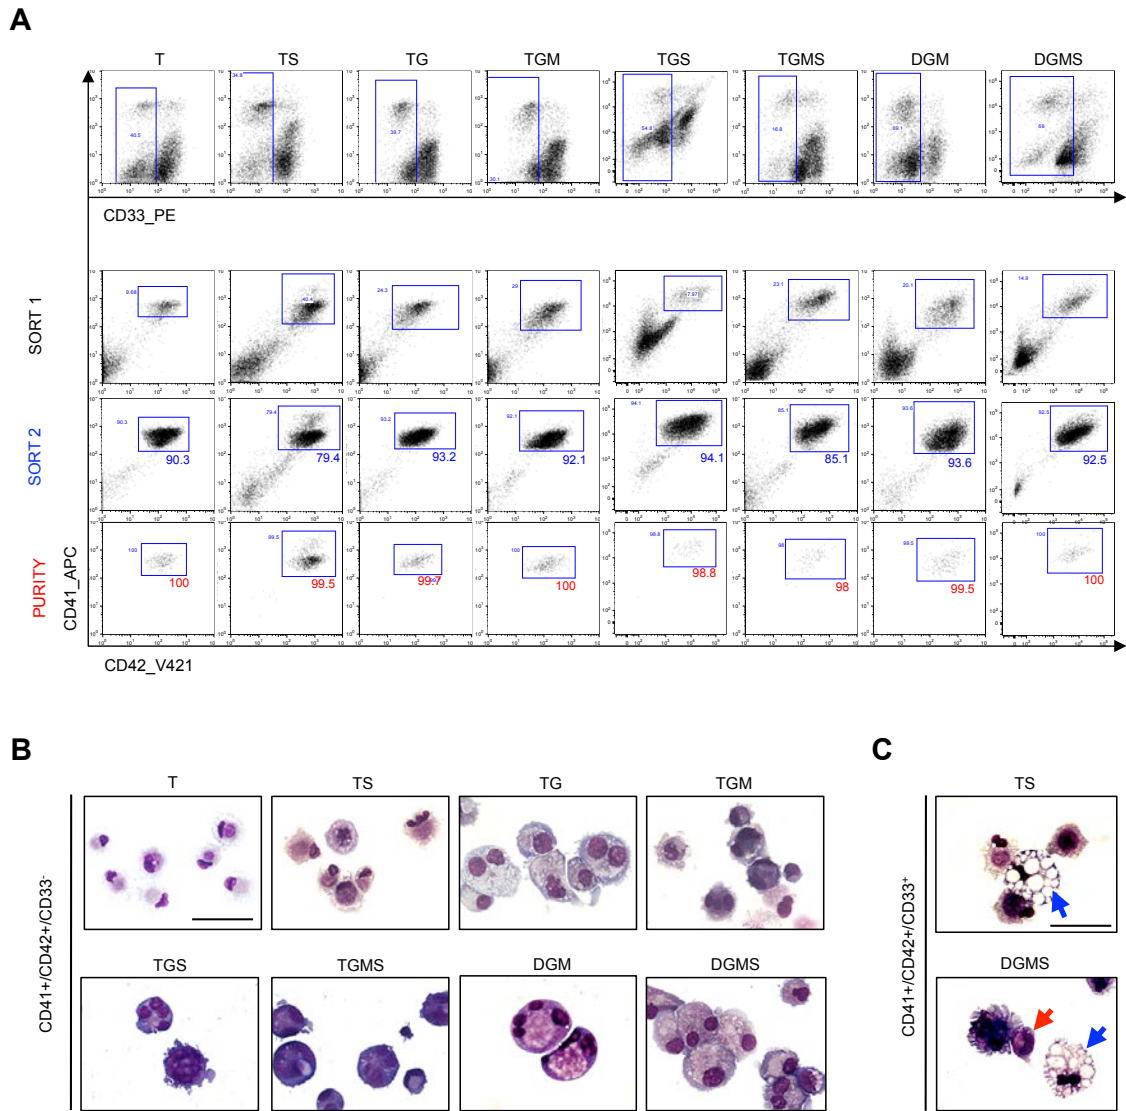

**Figure S6. RNaseq analyses of iPSC-derived MK according to the different genotypes.**

(A) Gating and sorting strategies used to obtain a pure MK population.  $CD41^+CD33^+$  were excluded from the sorting; keeping only the  $CD41^+CD42^+CD33^-$  cells. At the end of the first cell sorting, the purity varied from 79% to 94%, while a homogenous purity of nearly 100% was reached for all the genotypes at the end of the second cell sorting. (B) May Grünwald Giemsa coloration of the cytopinned  $CD33^-$  fraction from  $CD41^+CD42^+$  MK population. Note the presence of MK without any contaminating cells. Scale bar:  $50\ \mu\text{m}$ . (C) May Grünwald Giemsa coloration of the cytopinned  $CD33^+$  fraction from  $CD41^+CD42^+$  MK population. Note the presence of macrophage (blue arrowhead) or granulocyte (red arrowhead) contaminating cells. Scale bar:  $50\ \mu\text{m}$ .

352  
353

**Figure S6 (continued)**

**D**

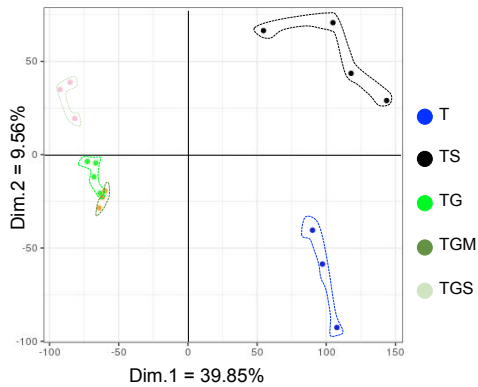

**E**

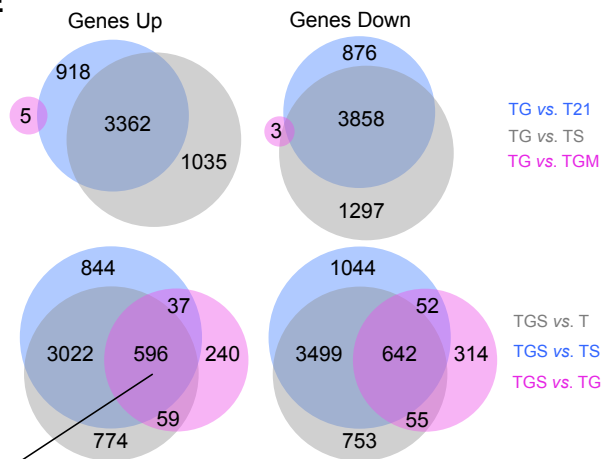

**F**

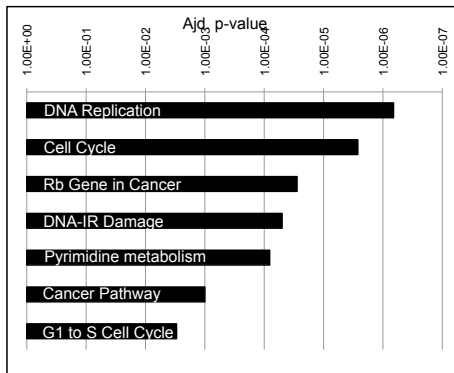

**G**

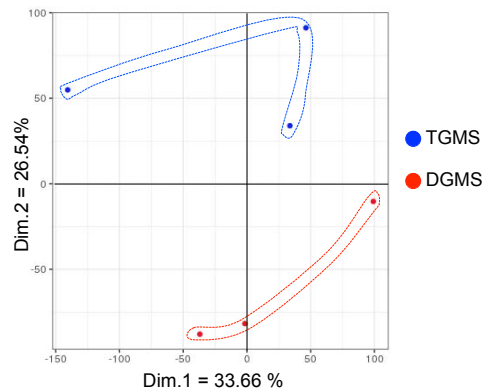

**H**

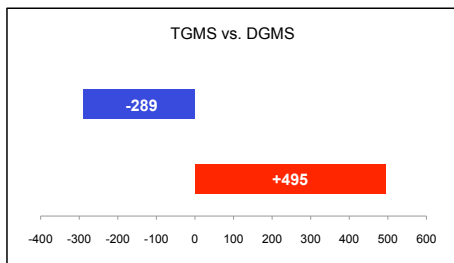

**(D)** Principal Component Analyses (PCA) of RNaseq data obtained from T, TS, TG, TGM and TGS-derived MK. RNaseq was performed on three to four biological replicates for each condition. **(E)** Venn diagram illustrates common and differentially expressed genes. Significantly up/downregulated genes (adjusted  $p$ -value  $< 0.05$ ) were compared between the indicated conditions. **(F)** Transcriptional signatures obtained from the commonly upregulated genes in TGS compared either to T, TS or TG. **(G)** PCA of RNaseq data obtained from TGMS and DGMS-derived MK. RNaseq was performed on three biological replicates for each condition. **(H)** Bar plot showing the number of up- or downregulated genes in TGMS compared to DGMS-derived MK. Adjusted  $p$ -value  $< 0.05$ .

354  
355

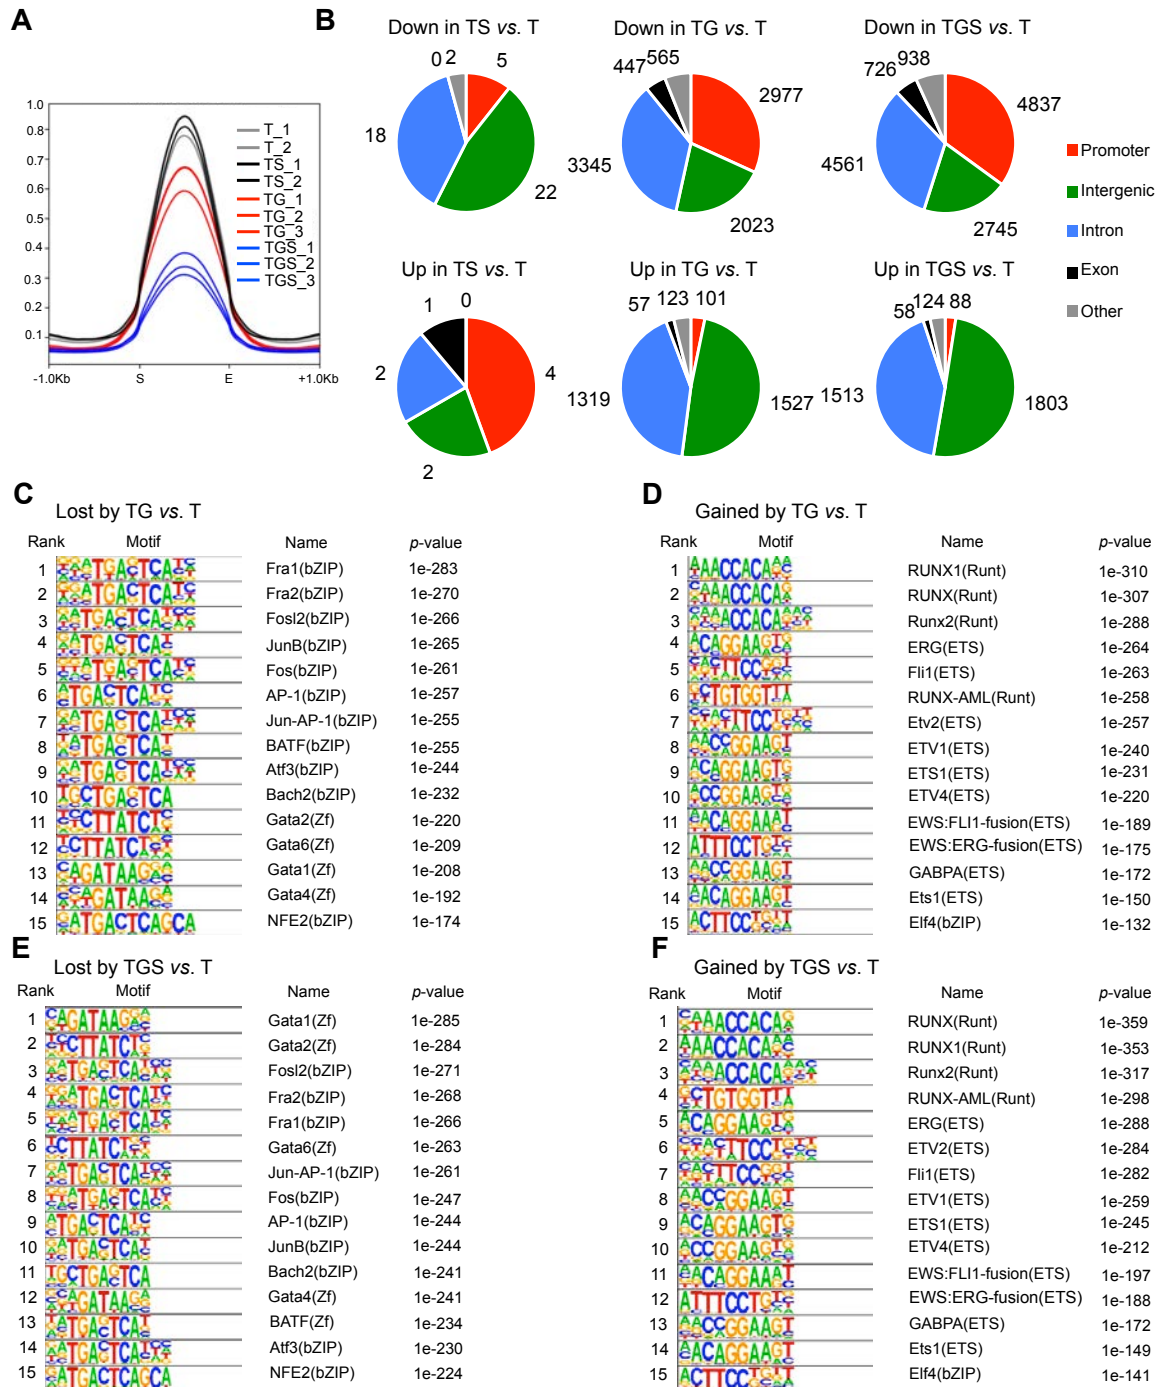

**Figure S7: ATACseq analyses of iPSC-derived MK.**

(A) Metaplot of ATAC peak signal in T compared to either TS, TG or TGS iPSC-derived MK. The start (S) and the end (E) of the narrow peaks were plotted across a 1-Kb flanking window; the y-axis indicates depth per million mapped reads. Two replicates are shown for T and TS, and three replicates are shown for TG and TGS. (B) Pie charts showing the distribution of accessible sites that were gained or lost in TS vs. T, TG vs. T and TGS vs. T. (C) Rank list of motifs that lost accessibility in TG vs. T. (D) Rank list of motifs that gained accessibility in TG vs. T. (E) Rank list of motifs that lost accessibility in TGS vs. T. (F) Rank list of motifs that gained accessibility in TGS vs. T.

**Figure S7 (continued)**

**G**

Lost by TGS vs. TG

| Rank | Motif | Name           | p-value |
|------|-------|----------------|---------|
| 1    |       | Fli1(ETS)      | 1e-139  |
| 2    |       | ERG(ETS)       | 1e-136  |
| 3    |       | ETV4(ETS)      | 1e-124  |
| 4    |       | ETV1(ETS)      | 1e-119  |
| 5    |       | ETV2(ETS)      | 1e-117  |
| 6    |       | RUNX1(Runt)    | 1e-114  |
| 7    |       | RUNX(Runt)     | 1e-108  |
| 8    |       | ETS1(ETS)      | 1e-107  |
| 9    |       | GABPA(ETS)     | 1e-96   |
| 10   |       | RUNX2(Runt)    | 1e-90   |
| 11   |       | EWS:FLI1(ETS)  | 1e-89   |
| 12   |       | RUNX-AML(Runt) | 1e-80   |
| 13   |       | EWS:ERG(ETS)   | 1e-76   |
| 14   |       | Fra2(bZIP)     | 1e-72   |
| 15   |       | Fosl2(bZIP)    | 1e-69   |

**H**

Up by TGS vs. TG

| Rank | Motif | Name            | p-value |
|------|-------|-----------------|---------|
| 1    |       | GATA3(Zf)       | 1e-20   |
| 2    |       | ERE(NR)         | 1e-9    |
| 3    |       | ZNF189(Zf)      | 1e-9    |
| 4    |       | Chop(bZIP)      | 1e-7    |
| 5    |       | Atf4(bZIP)      | 1e-7    |
| 6    |       | HLF(bZIP)       | 1e-5    |
| 7    |       | NFIL3(bZIP)     | 1e-5    |
| 8    |       | Sox9(HMG)       | 1e-5    |
| 9    |       | CREB5(bZIP)     | 1e-4    |
| 10   |       | TEAD1(TEAD)     | 1e-3    |
| 11   |       | NFAT(RHD)       | 1e-3    |
| 12   |       | CEBP-AP1(bZIP)  | 1e-3    |
| 13   |       | CEBP(CEBP)      | 1e-3    |
| 14   |       | TEAD3(TEA)      | 1e-3    |
| 15   |       | Foxh1(Forkhead) | 1e-3    |

**(G)** Rank list of motifs that lost accessibility in TGS vs. TG. **(H)** Rank list of motifs that gained accessibility in TGS vs. TG.

358  
359

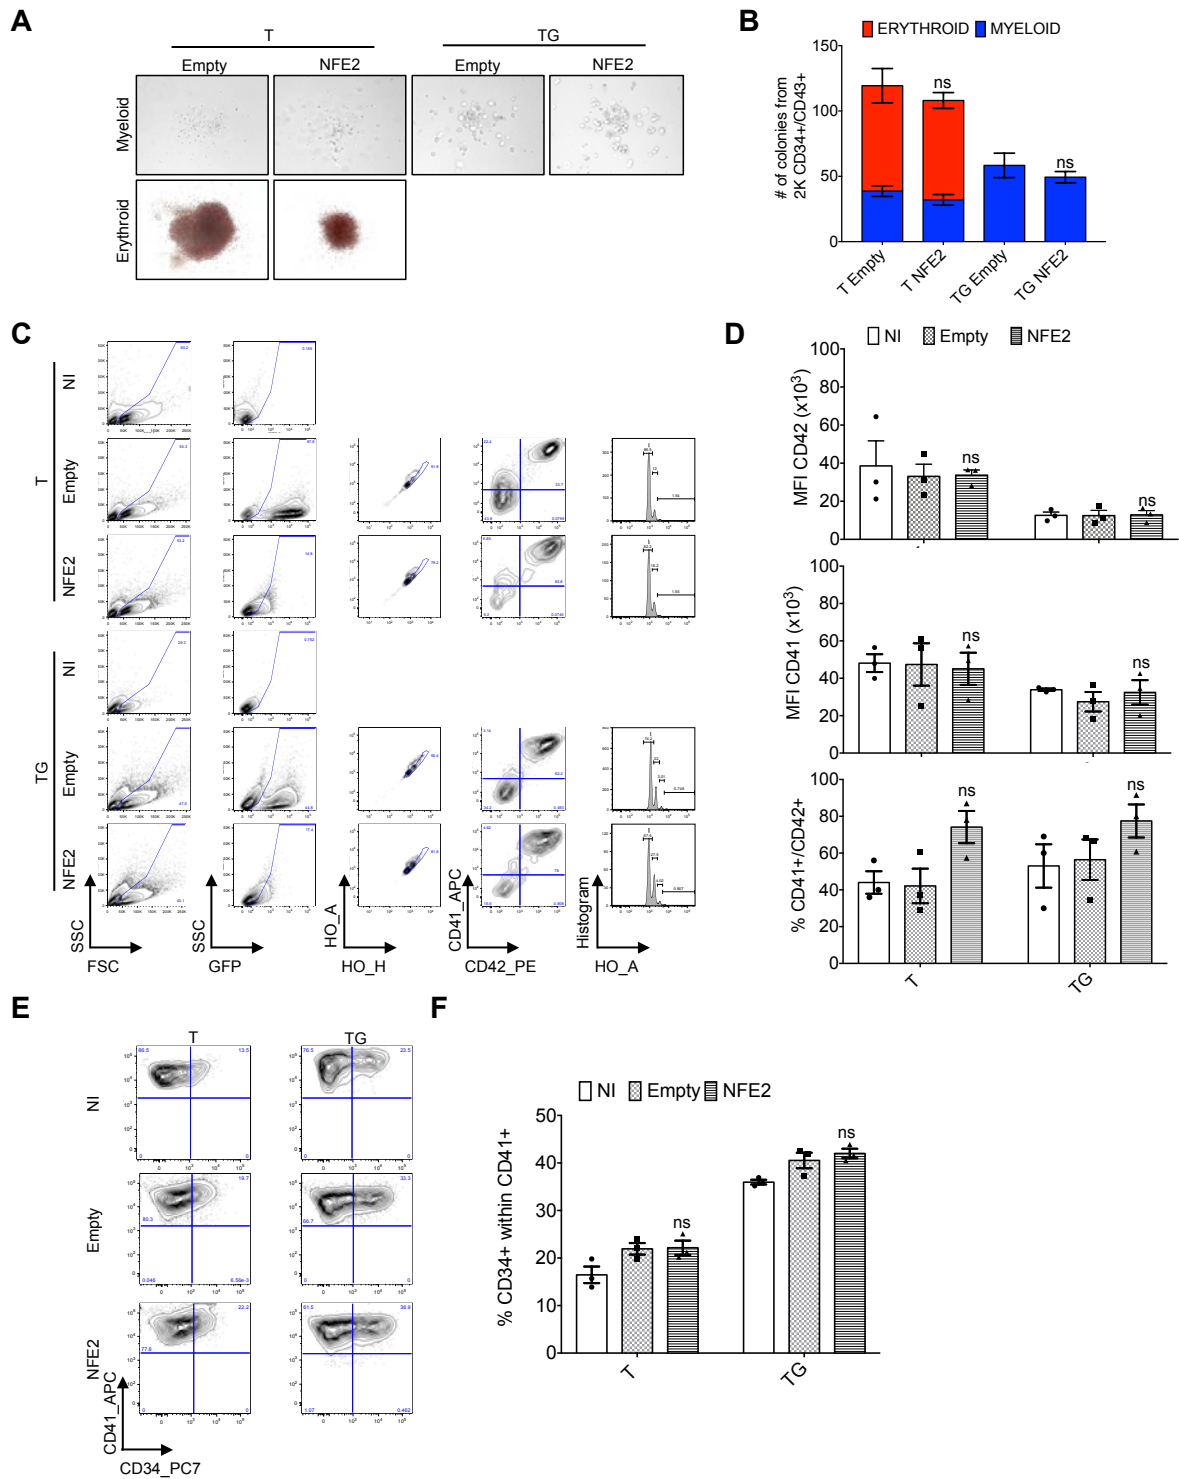

**Figure S8. Effects of NFE2 overexpression on T or TG-derived MK.**

(A) Photomicrographs showing myeloid or erythroid colonies from T or TG transduced either with the empty or the NFE2 lentiviral vector. Scale bar: 500  $\mu$ m. (B) Histogram showing the mean number of CFU-erythroid or myeloid colonies from T or TG transduced either with the empty or the NFE2 lentiviral vector. The results are represented as the mean  $\pm$  SEM,  $n = 3$ . ns: not statistically significant. (C) Gating strategy used to assess MK ploidy in the conditions tested. NI: No infection. (D) Mean percentage and Mean Fluorescence Intensity (MFI) of CD41/CD42 according to the compared conditions. The results are represented as the mean  $\pm$  SEM,  $n = 3$ . ns: not statistically significant, NI: No infection. (E) Contour plots showing the CD34<sup>+</sup> cell fraction from total CD41<sup>+</sup> MK. NI: No infection. (F) Histogram shows the mean percentage of CD34<sup>+</sup>/CD41<sup>+</sup> from the total CD41<sup>+</sup> MK. The results are represented as the mean  $\pm$  SEM,  $n = 3$ . ns: not statistically significant, NI: No infection.



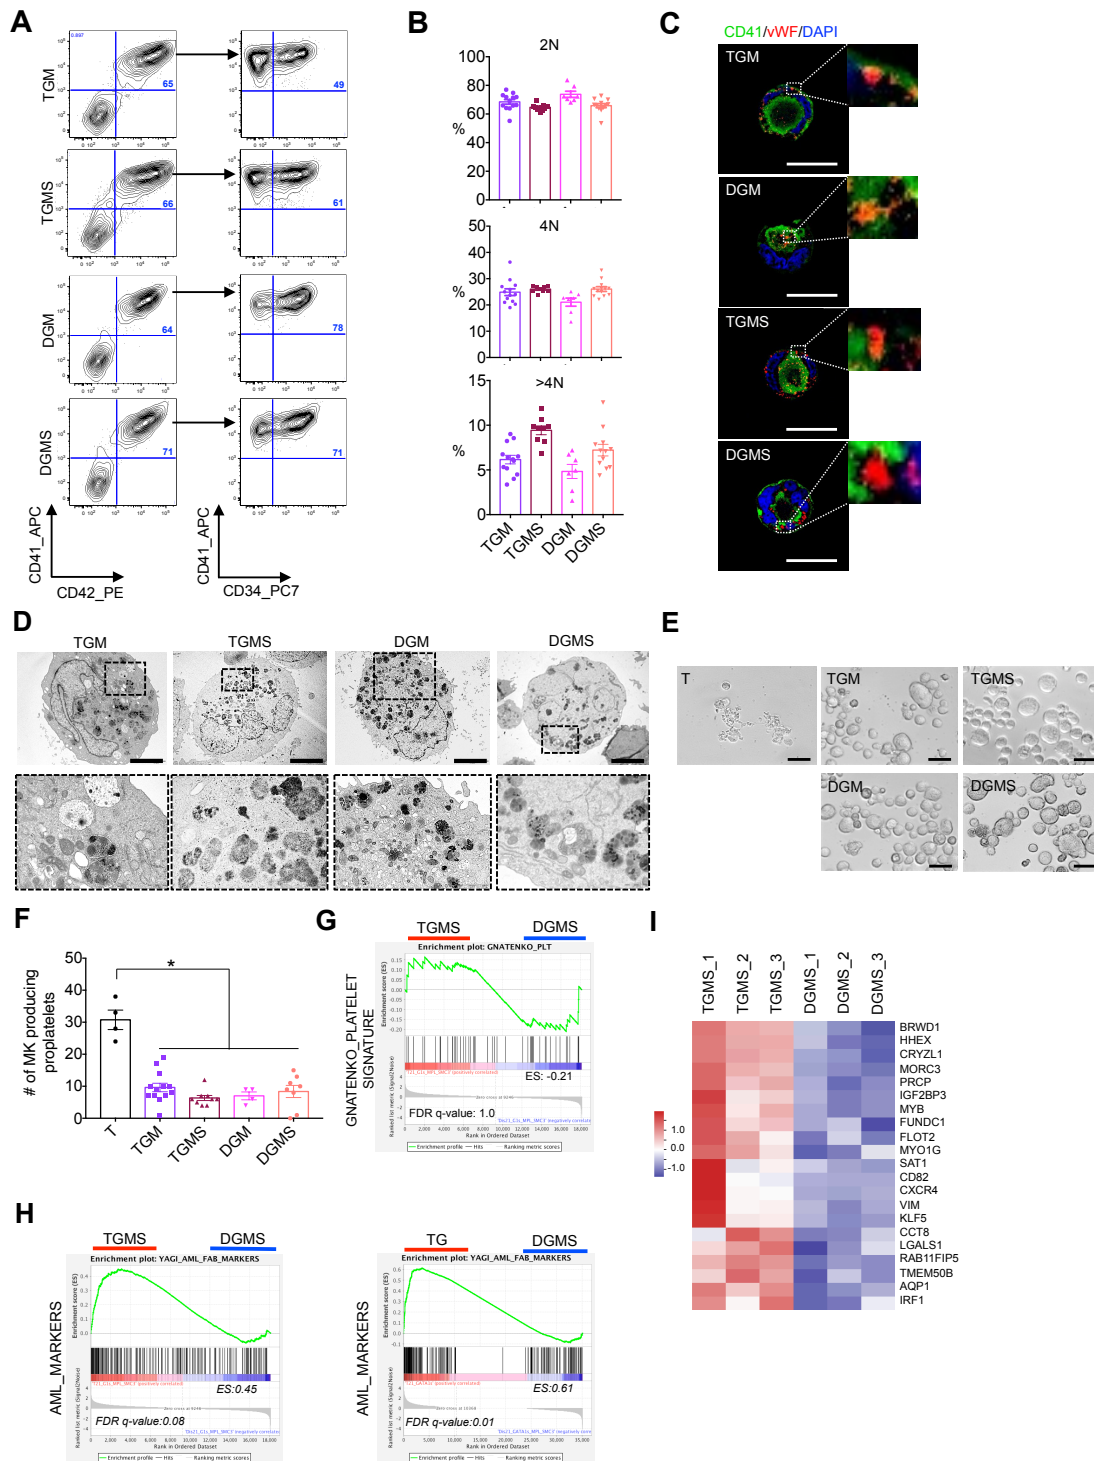

**Figure S9. Role of trisomy 21.**

(A) Contour plots showing the percentage of CD34<sup>+</sup> fraction from CD41<sup>+</sup>CD42<sup>+</sup> MK according to the indicated genotypes. (B) Histogram shows the mean percentage of 2N, 4N and >4N MK in the indicated genotypes. (C) Confocal analyses of CD41 and vWF expression in MK according to the indicated genotypes. Scale bars: 50  $\mu$ m. (D) Ultrastructural characterization of iPSC-derived MK in the indicated genotypes. One MK is shown for each condition (**upper panel**) and a part of which (dotted square) is enlarged (**lower panel**). Note the presence of the typical TG MK maturation defects (described in figure 3E) in TGM, TGMS, DGM and DGMS conditions. Scale bars: 5  $\mu$ m. (E) Representative microphotographs of CD41<sup>+</sup>CD42<sup>+</sup> MK at day 3 of culture. Scale bars: 50  $\mu$ m. (F) Histogram shows the number of MK forming proplatelets according to the different genotypes. The results are represented as the mean  $\pm$  SEM,  $n = 3$  to 4. The number of clones tested per genotype is: 4 (TGM), 3 (TGMS), 1 (DGM), 2 (DGMS). (G) GSEA of platelet marker genes (Gnatenko et al., 2003) in TGMS vs. DGMS-derived MK. (H) GSEA of AML gene markers in the indicated comparisons. (I) Heatmap shows the top 21 gene marker of AML in TGMS vs. DGMS-derived MK.

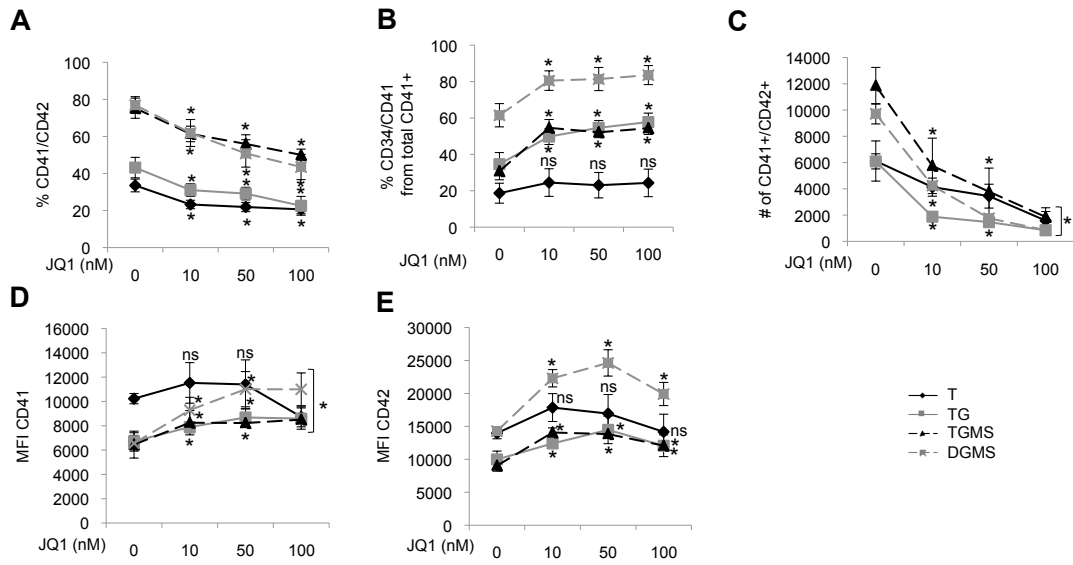

363  
364

365 **Supplemental Tables**

366 **Table S1:** List of off-target sites verified for all the CRISPR-edited iPSC clones (related to Figure  
367 S1).

| Targeted gene | iPSC lines tested for off-targets                                                 | Off-target site                       | Off-target sequence          | Positions of the mismatches on the off-target sequence | Result: Sanger sequencing |
|---------------|-----------------------------------------------------------------------------------|---------------------------------------|------------------------------|--------------------------------------------------------|---------------------------|
| <i>GATA1</i>  | T21 GATA1s p. Y62Qfs*4 and p. Y63Lfs*5                                            | 3: intron: ASAP1                      | CTGCAACACTGCCCT<br>ACTAC AGG | --- * * --- * ---                                      | Wild type                 |
|               |                                                                                   | 4: exon: SREBF2                       | ATGCGGCTCTGGCC<br>TATCAC CGG | * --- * --- * * ---                                    | Wild type                 |
|               |                                                                                   | 4: exon: XPNPEP2                      | ATGCTGCCCTGGCC<br>CACTAC AGG | * --- * --- * --- * ---                                | Wild type                 |
|               |                                                                                   | 4: intron: DNAH8                      | CTGTGTCAGTGACC<br>TACTAC TGG | --- * * --- * ---                                      | Wild type                 |
|               |                                                                                   | 4: exon: THOC5                        | CTCCGGCAGTGGCT<br>TACTCC CGG | --- * --- * --- * --- *                                | Wild type                 |
| <i>MPL</i>    | T21 and Dis21 GATA1s p. Y63Lfs*5 MPL p. W515K                                     | 3: exon: BRAP                         | AGGAGCTGCTGCTG<br>CTGAGG CGG | * --- * * ---                                          | Wild type                 |
|               |                                                                                   | 3: exon: GABRG1                       | TCAGCCAGCTGCTG<br>CTGAGG TGG | - * * --- * ---                                        | Wild type                 |
|               |                                                                                   | 2: exon: TTC34                        | TGGCCCTGCTGCAG<br>CTGAGG AGG | --- * --- * ---                                        | Wild type                 |
|               |                                                                                   | 3: exon: BACH2                        | TGCTGCTGCTGCTG<br>CTGAGG CGG | --- * * * ---                                          | Wild type                 |
|               |                                                                                   | 3: intergenic:AC138647.1-AC104417.1   | CGGGCTTCCTGCTG<br>CTGAGG GGG | * --- * * ---                                          | Wild type                 |
|               |                                                                                   | 2: intergenic:AC106860.1-RP11-23406.2 | TGGGTCTGCTGCTG<br>CTGAGC TGG | --- * --- * ---                                        | Wild type                 |
|               |                                                                                   | 3: intron:DVL1                        | TGCAGCTGCTGCTG<br>CTGAGG AGG | --- * * * ---                                          | Wild type                 |
|               |                                                                                   | 3: intron:SDK2                        | TGGCTCAGCTGCTG<br>CTGAGG AGG | --- * * --- * ---                                      | Wild type                 |
|               |                                                                                   | 3: intergenic:RP11-719N22.2_SRP       | TAGGTCTGCTTCTG<br>CTGAGG AGG | --- * * --- * ---                                      | Wild type                 |
|               |                                                                                   | 3: intergenic:TBC1D22A-RP1-111J24.1   | TGGGGCTGCAGCTG<br>CTCAGG TGG | --- * --- * --- * ---                                  | Wild type                 |
|               |                                                                                   | 2: intergenic:NSDHL-ZNF185            | TGGGGCTGCTGCTG<br>CTGAGA TGG | --- * --- * ---                                        | Wild type                 |
|               |                                                                                   | 2: intron:OGDH                        | TGGTCTGCTGCTG<br>CTGAGT AGG  | --- * --- * ---                                        | Wild type                 |
|               |                                                                                   | 3: intergenic:RP11-426D19.1-MSI2      | GGGGCTGGCTGCTG<br>CTGAGG AGG | * --- * * ---                                          | Wild type                 |
|               |                                                                                   | intergenic:USP47-DKK3                 | TTGTGCTGCTGCTG<br>CTGAGG TGG | - * --- * * ---                                        | Wild type                 |
| <i>SMC3</i>   | Total T21 and Dis21 SMC3+/- mutant clones carrying or not the GATA1s and MPLW515K | 4: intron: PPAP2A                     | TGATAAAATTAGAT<br>AAGCCC TGG | * --- * --- * * ---                                    | Wild type                 |
|               |                                                                                   | 4: intron: SNX29                      | GGAAAAAGAAGA<br>CAAGCCC AGG  | --- * --- * * ---                                      | Wild type                 |
|               |                                                                                   | 4: exon: ZNF839                       | GGATAAAATCAGA<br>CGAATCT AGG | --- * --- * * * ---                                    | Wild type                 |
|               |                                                                                   | 4: exon: LINC00371                    | GGATACAGAGAGA<br>CGACCCC GGG | --- * * * --- * ---                                    | Wild type                 |
|               |                                                                                   | 3: intron:Y_RNA                       | AGATAAAATGAAA<br>CCAGCCC AGG | * --- * --- * ---                                      | Wild type                 |

|  |  |                |                              |                    |           |
|--|--|----------------|------------------------------|--------------------|-----------|
|  |  | 3: intron:MBD5 | GGATAAAGTGAGA<br>AGAGACC AGG | -----*-----*-----* | Wild type |
|--|--|----------------|------------------------------|--------------------|-----------|

368

369

370 **Table S2:** List of culture reagents with manufacturers and catalog numbers (related to  
 371 methods).

| <b>Product</b>                          | <b>Manufacturer</b>                       | <b>Catalog number</b> |
|-----------------------------------------|-------------------------------------------|-----------------------|
| (+)-JQ-1                                | CliniSciences, Nanterre, France           | HY-13030              |
| 1-thioglycerol                          | Sigma, St Quentin Fallavier, France       | #M6145                |
| CellTrace Violet Cell Proliferation Kit | ThermoFisher scientific, Illkirch, France | #C34557               |
| CHiR 99021 trihydrochloride             | TOCRIS, Rennes, France                    | #4953                 |
| hBMP4                                   | Peprotech, Neuilly-Sur-Seine, France      | #AF-120-05ET          |
| hFGF-basic                              | Peprotech, Neuilly-Sur-Seine, France      | #100-18B              |
| hFLT3L                                  | Celldex Therapeutics Inc, Needham, USA    | /                     |
| hIL-6                                   | Peprotech, Neuilly-Sur-Seine, France      | #200-06               |
| hSCF                                    | Biovitrum AB, Stockholm, Sweden           | /                     |
| hTPO                                    | Kirin Brewery, Tokyo, Japan               | /                     |
| hVEGF                                   | Peprotech, Neuilly-Sur-Seine, France      | #100-20               |
| Essential 8                             | Gibco, Villebon sur Yvette, France        | #A1517001             |
| Essential 8 Flex                        | Gibco, Villebon sur Yvette, France        | #2858501              |
| L-glutamine                             | Gibco, Villebon sur Yvette, France        | #25030081             |
| N-truncated vitronectin                 | Gibco, Villebon sur Yvette, France        | #A14700               |
| PlasmoTest - Mycoplasma Detection Kit   | Invitrogen, Toulouse, France              | #rep-pt1              |
| Ruxolitinib                             | Euromedex, Strasbourg France              | #S1378                |
| StemPro-34 SFM                          | Gibco, Villebon sur Yvette, France        | #10639011             |
| StemPro Accutase                        | Gibco, Villebon sur Yvette, France        | #A1110501             |
| Penicillin/Streptomycin                 | Gibco, Villebon sur Yvette, France        | #15140122             |
| Y-27632 dihydrochloride                 | TOCRIS, Rennes, France                    | #1254                 |

372

373

374 **Table S3:** List of CRISPR Cas9 sgRNA and primers for PCR amplification used (related to  
 375 methods).

| Locus                                                    | Forward (5' to 3')                         | Reverse (5' to 3')                          |
|----------------------------------------------------------|--------------------------------------------|---------------------------------------------|
| <b>CRISPR/Cas9 sgRNA</b>                                 |                                            |                                             |
| <i>GATA1</i>                                             | <b>CACCG</b> TGCGGCACTGGCCTACTAC           | <b>AAACG</b> TAGTAGGCCAGTGCCGCAC            |
| <i>SMC3</i>                                              | <b>CACCG</b> GGGATAAAAATGAGACGAGCCC        | <b>AAACG</b> GGGCTCGTCTCATTTTATCCC          |
| <i>MPL</i>                                               | <b>CACCG</b> CTGGCCTGCTGCTGCTGAGG          | <b>AAAC</b> CCTCAGCAGCAGCAGGCCAGC           |
| <b>PCR from genomic DNA - Genotype/Sanger sequencing</b> |                                            |                                             |
| <i>GATA1</i>                                             | CACACCAGAATCAGGGGTTT                       | CAGTTGAGGCAGGGTAGAGCCCCGTC                  |
| <i>SMC3</i>                                              | TTCTTCCACCTCTCTCCCA                        | AGCAAGGACCACATGGCTAA                        |
| <i>MPL</i>                                               | <b>P1_MPL:</b><br>TAGGATACGTAGCTCTCTGAGGTG | <b>P2_MPL:</b><br>GTCACAGAGCGAACCAAGAATG    |
|                                                          |                                            | <b>P3_Cherry:</b><br>GAAGCGCATGAACTCCTTGATG |
| <b>PCR from genomic DNA - Off targets</b>                |                                            |                                             |
| <b><i>GATA1</i></b>                                      |                                            |                                             |
| <i>ASAP1</i>                                             | TGGTGCTGATTATAGGAGTGAC                     | AAGCGTTTCCCCTCATCTCAG                       |
| <i>DNAH8</i>                                             | GATGTGCCTGTCAGTCACGATC                     | TTGACTGGAATGTTCTCTCACTC                     |
| <i>SREBF2</i>                                            | TGCTCAAGAAAGTCTTCCAGTG                     | TAAGGAGGAGAGGTAGCATGAGA                     |
| <i>XPNPEP2</i>                                           | TTCATTGACCATGCCTTGCCCTG                    | ACCTTCAACGTGGACTCAGGTC                      |
| <i>THOC5</i>                                             | TTCTTACTTCCGGTTCTCTATG                     | CAGGCTACATTACCACAATCAAG                     |
| <b><i>SMC3</i></b>                                       |                                            |                                             |
| <i>PPAP2A</i>                                            | AAGCCAGTGGTTCTTAAACTTGC                    | ATAGCTCTCCCCATGGACACTG                      |
| <i>LINC00371</i>                                         | TACTGGCTCAGGCAACTCTCTC                     | GATGGCCTATTCTATAAGTCCAC                     |
| <i>SNX29</i>                                             | AGAAGTCTTGCCTGAGAATGGAG                    | AGTGCCAGAAAGGCAGTTATTTT                     |
| <i>ZNF839</i>                                            | ACATTGTCACAGTGACTGATGCAG                   | TTCATCTGTGCAATATTCACATTA                    |
| Y RNA                                                    | CAAGATAAGGTTATTATAACTAC                    | TGTTAGACCTTTGATACCTAAAG                     |
| <i>MBD5</i>                                              | TTATCCTAACTCAAGTTAACCAG                    | CATTCCACTGTATTGTGTCCT                       |
| <b><i>MPL</i></b>                                        |                                            |                                             |
| <i>BACH2</i>                                             | CTCACGTTAGCGCTGTGCGAC                      | GTCACAATGTAGCGATTGAGAG                      |
| <i>BRAP</i>                                              | AACAACCAGTGACACACTCATAG                    | TCCTGCGCGCATGCGTAAACC                       |
| <i>GABRG1</i>                                            | AAGACCAACCTCACCCCTCTAC                     | TCTGCTGGGAGTCGCATCCTAC                      |
| <i>TTC34</i>                                             | AATGCAGTCGCTGGTCCAAAG                      | ATGGAGCTGGATTGAGAGGAC                       |
| AC138647.1-<br>AC104417.1                                | CATCCACCTCTCCAACAGAGTAA                    | TTATTTACTCAGCTCCACCTTG                      |
| AC106860.1-<br>RP11-23406.2                              | AGCATTATCCACAATCTGACTGA                    | CCACCTGTGTTTACTTAAGGTG                      |
| <i>DVL1</i>                                              | TGGCTGTGGACATCCTCACA                       | AAGGGACAGGGAATAGCCTG                        |
| <i>SDK2</i>                                              | AAGTACCATCGTGACCAAGGAT                     | CTTGGTGTGCTTTGGCAAAGAG                      |
| RP11-<br>719N22.2 SRP                                    | GTATCACTGTTGGAGAGAATATC                    | CAAATGCACTGGTGTATACATAC                     |
| TBC1D22A-<br>RP1-111J24.1                                | ACACGGAATAAAGATCAGTGACA                    | AAGCAGGTGCTTGACAGATGTG                      |
| NSDHL-<br>ZNF185                                         | CAAGAGAGCAATTCCTCACCC                      | AGAGGCTATGTCTCCTCTCTGA                      |
| <i>OGDH</i>                                              | ATCAGATGCTTAAAGTCTGTGG                     | AAGGCTTAAAGTGTGGCCTTAAC                     |
| RP11-426D19.1-<br>MSI2                                   | CCGACTTCTTCCAATAGCTTAG                     | CTGCATGTTATTAGCAGCCTTC                      |
| <i>USP47-DKK3</i>                                        | AATCTAACCTCTCCTCCCTCAA                     | TGTAGTGTGAGGGACAAAGACA                      |

376 **Table S4:** Growth factors and their concentrations used for hematopoietic differentiation from  
 377 iPSC (related to method).

|        | <b>BMP4</b> | <b>CHIR</b> | <b>VEGF</b> | <b>bFGF</b> | <b>SCF</b> | <b>Flt3L</b> | <b>TPO</b> | <b>IL6</b> |
|--------|-------------|-------------|-------------|-------------|------------|--------------|------------|------------|
| Day 0  | 10ng/mL     | 930 ng/mL   | 50ng/mL     |             |            |              |            |            |
| Day 1  | 10ng/mL     |             | 50ng/mL     | 20ng/mL     |            |              |            |            |
| Day 4  |             |             | 15ng/mL     | 5ng/mL      |            |              |            |            |
| Day 6  |             |             | 50ng/mL     | 50ng/mL     | 50ng/mL    | 5ng/mL       |            |            |
| Day 7  |             |             | 50ng/mL     | 50ng/mL     | 50ng/mL    | 5ng/mL       | 50ng/mL    | 10ng/mL    |
| Day 8  |             |             | 50ng/mL     | 50ng/mL     | 50ng/mL    | 5ng/mL       | 50ng/mL    | 10ng/mL    |
| Day 11 |             |             | 50ng/mL     | 50ng/mL     | 50ng/mL    | 5ng/mL       | 50ng/mL    | 10ng/mL    |
| Day 13 |             |             | 50ng/mL     | 50ng/mL     | 50ng/mL    | 5ng/mL       | 50ng/mL    | 10ng/mL    |

378

379

380 **Table S5:** List of antibodies (related to methods).

| Antibody                        | Manufacturer                        | Catalog number        | Working dilution | Technique          |
|---------------------------------|-------------------------------------|-----------------------|------------------|--------------------|
| CD34 - PE Cy7                   | BD Biosciences, Isère, France       | #560710 / 581         | 1/100            | Flow cytometry     |
| CD43 - APC                      | BD Biosciences, Isère, France       | #560198 / 1G10        | 1/100            |                    |
| CD41a - APC                     | BD Biosciences, Isère, France       | #559777 / HIP8        | 1/100            |                    |
| CD42a - PE                      | BD Biosciences, Isère, France       | #558819 / ALMA.16     | 1/100            |                    |
| CD42b - BV421                   | BD Biosciences, Isère, France       | #740075 / HIP1        | 1/100            |                    |
| CD33 - PE                       | BD Biosciences, Isère, France       | #561816 / WM53        | 1/100            |                    |
| CD117 PE Cy7                    | BD Biosciences, Isère, France       | #339217               | 1/100            |                    |
| GATA1/GATA1s                    | Abcam, Amsterdam, Netherlands       | #ab133274             | 1/100            |                    |
| CD41a                           | Fisher scientific, Illkirch, France | #BDB555465 / HIP8, BD | 1/100            | Immunofluorescence |
| vWF                             | Dako, Les Ulis, France              | #A0082 / P04275       | 1/1000           |                    |
| vWF                             | Abcam, Amsterdam, Netherlands       | #ab194405 / 3E2D10    | 1/200            |                    |
| CD63                            | Abcam, Amsterdam, Netherlands       | #ab118307             | 1/100            |                    |
| Beta1-Tubulin                   | Abcam, Amsterdam, Netherlands       | #ab204947 / 2A1A9     | 1/100            |                    |
| GFP                             | Abcam, Amsterdam, Netherlands       | #ab183734 / EPR14104  | 1/200            |                    |
| IgG (H+L) anti-Mouse Alexa 488  | Thermo Fischer Scientific           | #A11029               | 1/500            |                    |
| IgG (H+L) anti-Rabbit Alexa 488 | Thermo Fischer Scientific           | #A11008               | 1/500            |                    |
| IgG (H+L) anti-Mouse Alexa 546  | Thermo Fischer Scientific           | #A11003               | 1/500            |                    |
| IgG (H+L) anti-Rabbit Alexa 546 | Thermo Fischer Scientific           | #A11010               | 1/500            |                    |
| GATA1/GATA1s                    | Abcam, Amsterdam, Netherlands       | #ab11852              | 1/1000           |                    |
| SMC3                            | Abcam, Amsterdam, Netherlands       | #ab228782             | 1/1000           |                    |
| Histone 3                       | Abcam, Amsterdam, Netherlands       | #ab1791               | 1/5000           | Western blot       |
| PCNA                            | Santa Cruz                          | #sc-56                | 1/5000           |                    |
| GATA1/GATA1s                    | Abcam, Amsterdam, Netherlands       | #ab11852              | 1/100            | CUT & Tag          |

381

382



383 **Table S6:** List of the primers used for qRT-PCR (related to methods).

| Locus             | Forward (5' to 3')        | Reverse (5' to 3')         |
|-------------------|---------------------------|----------------------------|
| <b>Taq Man</b>    |                           |                            |
| <i>NFE2 probe</i> | CATCACCGAGCTGCAGGGTCTGA   |                            |
| <i>NFE2</i>       | TACAGCTGTCCACTTCAGAGC     | GGCTTGGGGCTCAAATGATG       |
| <i>HPRT probe</i> | CTTGCTGGTGAAAAGGACCCACGA  |                            |
| <i>HPRT</i>       | GGCAGTATAATCCAAAGTTGGTCAA | TCAAATCCAACAAAGTCTGGCTTATA |
| <b>SYBR Green</b> |                           |                            |
| <i>CAPN2</i>      | TGCTCTTTGTGCATTCAGCC      | AGCGCTTCATAGCATCCGTT       |
| <i>TUBB1</i>      | CTCAGAGCAAGGATGCGTGA      | CAAGTCGATCCCGTGTTCCT       |
| <i>RAB27B</i>     | GGGAAGACATTTCTTTATAG      | TTCACAATAAGCATTGCTTGC      |
| <i>TBXAS1</i>     | GCGGAGAGACTTCCTCCAAATG    | CTGCAATCACCATGTCCAGATAG    |
| <i>GPIBA</i>      | TCCTCCATGGGGCTAGAAGA      | CCTTACACTCGCCTCACTCA       |

384

# Full unedited blot for Figure S1B

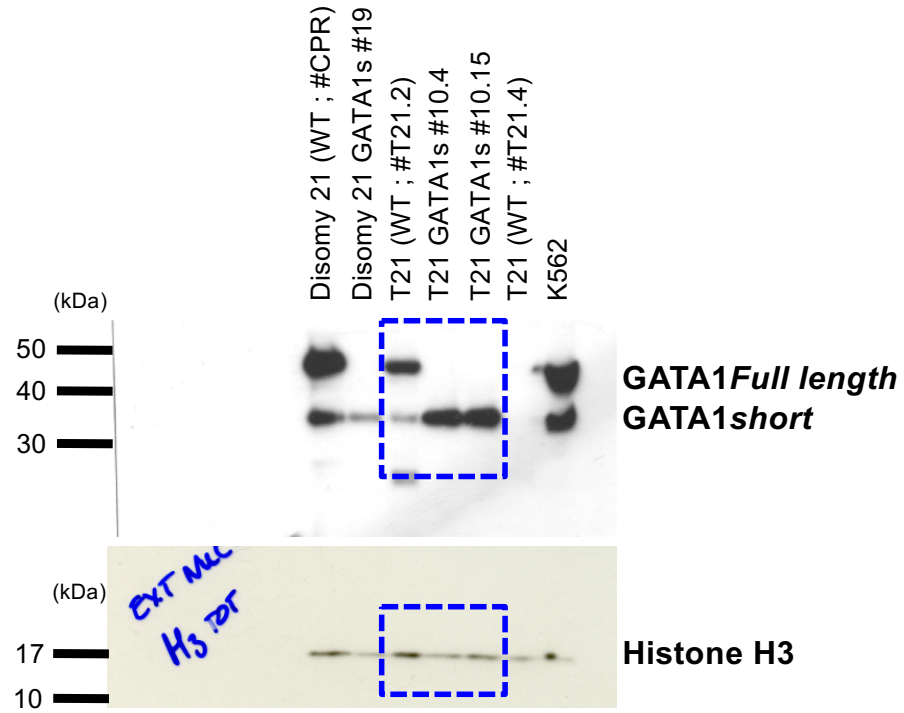

# Full unedited gel for Figure S1E

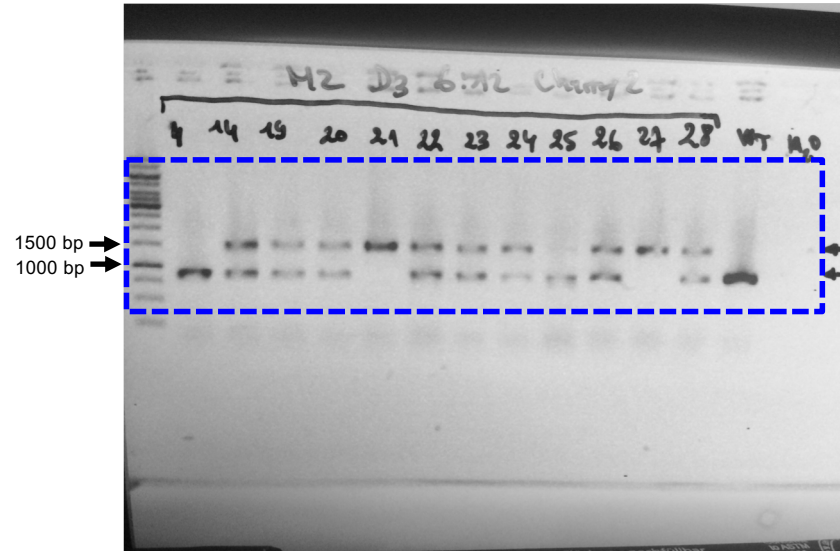

# Full unedited gel for Figure S1J

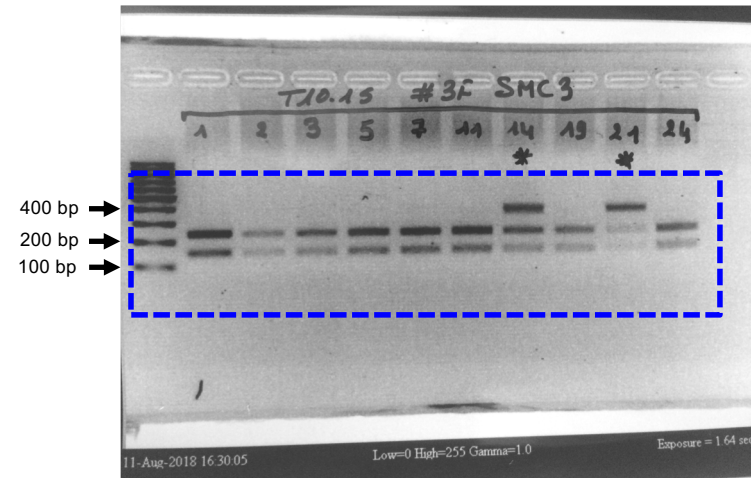

Supplement: jci-132-156290-s009.pdf [file jci-132-156290-s009.pdf]
